# Supplementary material
Source: PubMed Central journal article supplement (PMC3324019)
Supplement: 1118360109_sapp.pdf [file 1118360109_sapp.pdf]

## Supporting Information

### SI MATERIALS AND METHODS:

#### Collection of DNA Samples

DNA samples from the aardwolf (*Proteles cristatus*), Asian small-clawed otter (*Amblonyx cinereus*), banded linsang (*Prionodon linsang*), California sea lion (*Zalophus californianus californianus*), Canadian otter (*Lontra canadensis*), fossa (*Cryptoprocta ferox*), Pacific harbor seal (*Phoca vitulina richardii*), raccoon (*Procyon lotor*), red wolf (*Canis rufus*) spectacled bear (*Tremarctos ornatus*) and spotted hyena (*Crocuta crocuta*) were provided by the Conservation and Research for Endangered Species Program at the San Diego Zoo. DNA samples of a Southern fur seal (*Arctocephalus forsteri*) and raccoon (*Procyon lotor*) were provided by Dr. Stephen O'Brien (National Cancer Institute). A DNA sample from the bottlenose dolphin (*Tursiops truncatus*) was provided by Therion International (Saratoga Springs, New York).

#### Sequencing *Tas1r2* from Selected Species within Carnivora and Sequencing Sea Lion *Tas1r1* and *Tas1r3*

The design of degenerate primers for *Tas1r2* was described previously (1). Genomic based polymerase chain reaction (PCR) was conducted to amplify all six exons of *Tas1r2* from the 12 carnivore species using degenerate primers designed from conserved exon-intron boundary sequences. Genomic-based polymerase chain reaction (PCR) was also conducted to amplify all six exons of *Tas1r1* and 3 exons (2, 4, 5) of *Tas1r3* from the sea lion using degenerate primers (Supplementary Table 2) designed from conserved exon-intron boundary sequences of dog, cat and giant panda. PCR mixtures (50  $\mu$ l) include 1  $\mu$ l (50ng/ $\mu$ l) genomic

DNA, 5 µl 10 x buffer, 1 µl of each primer (primer concentration varies according to degeneracy of the primer from 10 µM to 80 µM), 0.25 µl Taq polymerase (Roche). The PCR conditions were: 94 °C for 2min; 35 cycles of 94 °C for 30 s, 66 °C for 45s, 72 °C for 2 min; 72 °C for 10 min; and a 4 °C hold. PCR products were purified and sequenced directly or after being subcloned into pGEM-Teasy vector at the sequencing facility of the University of Pennsylvania. Each PCR product was sequenced from both directions to validate the results.

For fragments containing open reading frame mutations, PCR was repeated to confirm the results using either the original DNA samples or DNA samples from additional animals when available (3 additional fossas, 1 additional Asian small-clawed otter, 1 additional spotted hyena and 1 additional California sea lion). We assembled the coding sequences of *Tas1r2* from all the selected carnivore species and sea lion *Tas1r1* and *Tas1r3* using Sequencer 4.8 with the dog *Tas1r2*, *Tas1r1* and *Tas1r3* sequence as references, respectively.

### **Data-mining of the Dolphin Whole Genome Shotgun (WGS) Assembly**

To identify the dolphin *Tas1rs*, TblastN searches were conducted on the dolphin genome database by using the dog T1R1 (xp\_546753), T1R2 (xp\_855275) and T1R3 (xp\_848708) amino acid sequences as queries. These searches retrieved two contigs (ABRN01270722 and ABRN01270723) for *Tas1r1*, a single contig (ABRN01341268) for *Tas1r2*, and two contigs (ABRN01316859 and ABRN01316858) for *Tas1r3*, respectively. We determined the exon-intron borders of exon 1- 6 of dolphin *Tas1rs* using Spidey (2) and TBLASTN (3) programs with dog *Tas1r* sequences as references. We aligned dolphin *Tas1r* exon sequences with that of dog and human using an modified ClustalW (4) program installed in AlignX ([www.invitrogen.com](http://www.invitrogen.com)). All the mutations have been confirmed by sequencing *Tas1rs* amplified from another dolphin using gene-specific primers.

To identify the dolphin *Tas2rs*, TblastN searches were conducted on the dolphin genome database using the dog and cow *Tas2r* intact receptors (Genbank accession #: AB249684-AB249731) as queries (5). AB249725 (*bota-T2R56*) is a partial sequence of cow *Tas2r60* (Genbank accession # xm\_002687121, referred to as *Bota-Tas2r60*). Conversely, each identified dolphin *Tas2r* sequences were used to blast Nucleotide collection database (nr/nt) to determine the similarity toward *Tas2rs* from other species and then named afterward their dog or cow orthologs. The *Tas2r* sequences from dolphin, dog and cow were aligned by ClustalW (4). A phylogenetic tree was constructed by the Neighbor-Joining (NJ) method implemented in MEGA 5 (6).

### **Evolutionary Analysis**

Nucleotide sequences of *Tas1r2* from the selected carnivore species were aligned with CLUSTALX 1.81 (7), modified with Bioedit 7.04 (8), and confirmed by deduced amino acid sequence alignment. When allelic variations were found in individuals, we used the allelic sequence that was the same or similar to that of the reference dog sequence. In addition to the *Tas1r2* sequences from the 12 species reported in this study, we analyzed *Tas1r2* sequences from carnivore species available in NCBI database, including yellow mongoose (FJ356695), cat (AY819787), giant panda (GL193509), red panda (FJ356693), ferret (FJ356691) and dog (XM\_850182). A consensus phylogenetic tree was built using the maximal likelihood method implemented in MEGA5 after bootstrapping for 2000 times or the neighbor-joining method after bootstrapping 10,000 times (9). Nonsynonymous and synonymous nucleotide substitution rates were calculated using the likelihood method implemented in the CODEML program in PAML 4.1 (10). The sequence data file, configuration files and the result files for the CODEML analyses were provided (DocS2.rtf). We also used a recent published carnivore phylogeny to test

our models using CODEML (11) and conclusions reached using our tree were practically identical to those using the tree proposed by Yu et al (11).

### **Taste Testing**

The two-bowl preference tests were carried out as previously described (1). One bowl contained the test compound dissolved in water to a designated solubility, the other bowl contained an equal volume of water. The test period began at 9:30 am and ended 24 hr later. After 24 hr, the volume of fluid consumed from each bowl was recorded. Preference ratios were calculated as the ratio of taste solution intake to total fluid intake x 100%. A “strong” preference for the test compound is defined here as a preference score greater than 80%. Preferences above 80% are identified by a plus sign. For this study, we were given access to two Asian otters and four spectacled bears. The animals were born and raised at the Zoological Garden of Zurich in Germany. They were maintained and tested according to the Monell Chemical Senses Center animal protocol (Institutional Animal Care and Use Committee No. 1112) and with the permission and oversight of the director and staff of the zoo.

### **SI Figure legends:**

**Fig. S1: Start codon mutation and indel mutations found in the sea lion and fur seal *Tas1r2* coding sequences.** Shown in panels (A), (B), (C), and (D) are representative DNA chromatograms and *Tas1r2* nucleotide sequences of the sea lion and fur seal aligned with *Tas1r2* sequences from the dog. In panel A, the start codon in exon 1 was mutated to ATA in both the sea lion and fur seal *Tas1r2*s, preventing the initiation of T1R2 protein translation. In panel B, a 1-bp deletion between 579-580 bp was found in exon 3 of the sea lion *Tas1r2*. In panel C, a 2-bp deletion between 674-675 bp (exon 3 of sea lion *Tas1r2*) and a corresponding 2-bp deletion

between 675-676 bp (exon 3 of fur seal *Tas1r2*) were found. In panel D, a 1-bp deletion was found between 802-803 in exon 6 of both the sea lion and fur seal *Tas1r2*s.

**Fig. S2: Nonsense and indel mutations found in the pacific harbor seal *Tas1r2*.** Shown in panels (A) and (B) are representative DNA chromatograms and *Tas1r2* nucleotide sequences of the pacific harbor seal aligned with *Tas1r2* nucleotide sequences from the dog. In Panel A, a premature stop codon TAA (position 32 in exon 6) was found. The deduced amino acid sequence is shown up to the stop codon. In panel B, a 2-bp deletion was found between 192-193 bp in exon 6.

**Fig. S3. An indel mutation found in the Asian small-clawed otter *Tas1r2*.** Shown are representative DNA chromatogram and *Tas1r2* nucleotide sequences aligned with *Tas1r2* sequences from the Canadian otter and dog. A 1-bp insertion was found in position 360 in exon 3. The translated amino acid sequence is shown up to the codon which contains the frameshift mutation.

**Fig. S4. An indel mutation found in the spotted hyena *Tas1r2*.** Shown are representative DNA chromatogram and *Tas1r2* nucleotide sequences aligned with *Tas1r2* sequences from the aardwolf and dog. A 1-bp deletion was found between 130-131 bp of exon 2 of the spotted hyena *Tas1r2*. The translated amino acid sequence is shown up to the codon which contains the frameshift mutation.

**Fig. S5. Nonsense and indel mutation found in the Fossa *Tas1r2*.** Shown in panel (A) and (B) are representative DNA chromatograms and *Tas1r2* nucleotide sequences aligned with *Tas1r2* sequences from the dog. In panel A, a premature stop codon TAG (Position 125 in exon 3) was found in the Fossa *Tas1r2*. Though, polymorphism was observed in this position by sequencing

other fossa individuals. The translated amino acid sequence is shown up to the nonsense mutation. In panel B, a 1-bp insertion at 58 bp was found in exon 4 of the fossa *Tas1r2*.

**Fig. S6: Multiple indel mutations found in the banded linsang *Tas1r2*.** Shown in panel A through G are chromatograms and nucleotide sequences of the banded linsang *Tas1r2* aligned with the dog coding sequences. In Panel A, a 1-bp insertion was found at 70 bp of exon 2 of the linsang *Tas1r2*. The translated amino acid sequence is shown up to the codon which contains the frameshift mutation. In Panel B, a 10-bp micro-deletion was found between 274-275 bp of exon 2 of the linsang *Tas1r2*. In Panel C, a 14-bp insertion was found in position between 78-91 bp of exon 4. In Panel D, a 20-bp deletion was found between 27-28 bp of exon 5. In Panel E, a 2-bp deletion was found between 54-55 bp of exon 5. In panel F, a 1-bp deletion was found between 210-211 bp of exon 6. In panel G, a 28-bp insertion was found between position 235-262 of exon 6 of the linsang *Tas1r2*. In panel H, a 1-bp insertion was found between position 444-445 of exon 6.

**Fig. S7. Evolutionary relationships of the order Carnivora**

The evolutionary history was inferred using the Neighbor-Joining method (12). The bootstrap consensus tree inferred from 10000 replicates (13) is taken to represent the evolutionary history of the taxa analyzed (13). Branches corresponding to partitions reproduced in less than 50% bootstrap replicates are collapsed. The percentage of replicate trees in which the associated taxa clustered together in the bootstrap test (10000 replicates) are shown next to the branches (13). The tree is drawn to scale, with branch lengths in the same units as those of the evolutionary distances used to infer the phylogenetic tree. The evolutionary distances were computed using the Maximum Composite Likelihood method (14) and are in the units of the number of base

substitutions per site. The rate variation among sites was modeled with a gamma distribution (shape parameter = 2). The analysis involved 19 nucleotide sequences. Codon positions included were 1st+2nd+3rd. All positions containing gaps and missing data were eliminated. There were a total of 2160 positions in the final dataset. Evolutionary analyses were conducted in MEGA5 (9). Species with a pseudogenized *Tas1r2* are marked with a diamond sign (red indicated species whose *Tas1r2* has been characterized in this study, grey indicated species whose *Tas1r2* was reported previously).

**Fig. S8. The sea lion *Tas1r1* and *Tas1r3* genes are inactivated by pseudogenization.** A) The upper half showed a chromatogram trace of the sea lion *Tas1r1* exon 2 sequence in which a mutation was found. The lower half showed the alignment of the above sequence to the corresponding dog and human *Tas1r1* exon 2 sequences, highlighting a 1-bp deletion mutation in the sea lion *Tas1r1* exon 2. B) An additional 11-bp deletion mutation was found in the sea lion *Tas1r1* exon 6. The upper half showed a chromatogram trace of the sea lion *Tas1r1* exon 6 sequence in which the mutation was found and the lower half showed the alignment between sea lion, dog and human *Tas1r1* exon 6 sequences. C) The upper half showed a chromatogram trace of the dolphin *Tas1r3* exon 4 and the lower half showed the alignment of the sequence to the corresponding dog and human sequences, noting a 1-bp deletion mutation in the sea lion *Tas1r3*.

**Fig. S9: The dolphin *Tas1r* receptor genes are inactivated by pseudogenization.** A) The upper panel showed a representative chromatogram trace of the dolphin *Tas1r1* exon 4 sequence in which a mutation was found (ti: 1417589012). The lower half showed the alignment of the above sequence to the corresponding dog and human *Tas1r1* exon 4 sequences, highlighting a 5-bp deletion mutation in the dolphin *Tas1r1* exon 4. B) The upper part showed a representative chromatogram trace of the dolphin *Tas1r2* exon 3 (ti: 1489305729) and the lower part showed

the alignment of the sequence to the corresponding dog and human *Tas1r2* exon 3 sequences, noting an insertion mutation of a 20-bp in the dolphin *Tas1r2*. C) The upper half showed a representative chromatogram trace of the dolphin *Tas1r3* exon 6 sequence (ti: 1431864905), the lower part showed the alignment of the sequence to the corresponding dog and human *Tas1r3* exon 6 sequences, revealing a deletion mutation of 7-bp in the dolphin *Tas1r3* exon 6.

### **Doc. S1: Alignment of dolphin *Tas2r* receptor genes to the dog or cow orthologs.**

ClustalW alignments of each of 10 dolphin *Tas2rs* to the ortholog of dog or cow *Tas2s* are shown. Nonsense mutations or premature stop codons that result from frame-shift mutations are marked in pink. Frameshift mutation (insertion or deletion) are marked in red.

### **Fig. S10: Evolutionary relationships of dolphin, dog and cow *Tas2r* receptors**

The evolutionary relationship was inferred using the Neighbor-Joining method. The bootstrap consensus tree inferred from 2000 replicates is taken to represent the evolutionary history of *Tas2r* receptor genes analyzed. Branches corresponding to partitions reproduced in less than 50% bootstrap replicates are collapsed. The evolutionary distances were computed using the Maximum Composite Likelihood method and are in the units of the number of base substitutions per site. The analysis involved 58 nucleotide sequences (10 dolphin sequences, 19 dog (Cafa) sequences and 29 cow (Bota) sequences). Evolutionary analyses were conducted in MEGA5 (9).

### References

1. Li X, *et al.* (2009) Analyses of sweet receptor gene (*Tas1r2*) and preference for sweet stimuli in species of Carnivora. *J. Hered.* 100 Suppl 1:S90-100.
2. Wheelan SJ, Church DM, & Ostell JM (2001) Spidey: a tool for mRNA-to-genomic alignments. *Genome Res* 11(11):1952-1957.
3. Johnson M, *et al.* (2008) NCBI BLAST: a better web interface. *Nucleic Acids Res* 36(Web Server issue):W5-9.



4. Thompson JD, Higgins DG, & Gibson TJ (1994) CLUSTAL W: improving the sensitivity of progressive multiple sequence alignment through sequence weighting, position-specific gap penalties and weight matrix choice. *Nucleic Acids Res* 22(22):4673-4680.
5. Go Y, Satta Y, Takenaka O, & Takahata N (2005) Lineage-specific loss of function of bitter taste receptor genes in humans and nonhuman primates. *Genetics* 170(1):313-326.
6. Tamura K, *et al.* (2011) MEGA5: Molecular Evolutionary Genetics Analysis using Maximum Likelihood, Evolutionary Distance, and Maximum Parsimony Methods. *Mol Biol Evol*.
7. Thompson JD, Gibson TJ, Plewniak F, Jeanmougin F, & Higgins DG (1997) The CLUSTAL\_X windows interface: flexible strategies for multiple sequence alignment aided by quality analysis tools. *Nucleic Acids Res* 25(24):4876-4882.
8. Hall TA (1999) Bioedit: a user-friendly biological sequence alignment editor and analysis program for Windows 95/98/NT. *Nucleic Acids Symp Ser* 41:95-98.
9. Tamura K, *et al.* (2011) MEGA5: molecular evolutionary genetics analysis using maximum likelihood, evolutionary distance, and maximum parsimony methods. *Mol Biol Evol* 28(10):2731-2739.
10. Yang Z (2007) PAML 4: phylogenetic analysis by maximum likelihood. *Mol Biol Evol* 24(8):1586-1591.
11. Yu L, *et al.* (2011) Phylogenetic utility of nuclear introns in interfamilial relationships of Caniformia (order Carnivora). *Syst Biol* 60(2):175-187.
12. Saitou N & Nei M (1987) The neighbor-joining method: a new method for reconstructing phylogenetic trees. *Mol Biol Evol* 4(4):406-425.
13. Felsenstein J (1985) Confidence limits on phylogenies: An approach using the bootstrap. *Evolution* 39:783-791.
14. Tamura K, Nei M, & Kumar S (2004) Prospects for inferring very large phylogenies by using the neighbor-joining method. *Proc Natl Acad Sci U S A* 101(30):11030-11035.

Fig. S1

Sea lion and fur seal *Tas1r2* sequences

A

Dog Ex1 (-20) 5' GGGGACCCCCACTTCCCAGCCATGGGACCCCGGGCCAAGGCG 3'  
 Sea Lion Ex1 (-20) 5' AGGGACCCCCACTTCCCAGCCATAGGACCCAGGCCAAGGCA 3'  
 Fur Seal Ex1 (-20) 5' AGGGACCCCCACTTCCCAGCCATAGGACCCAGGCCAAGGCA 3'  
 (start codon mutation, no translation)

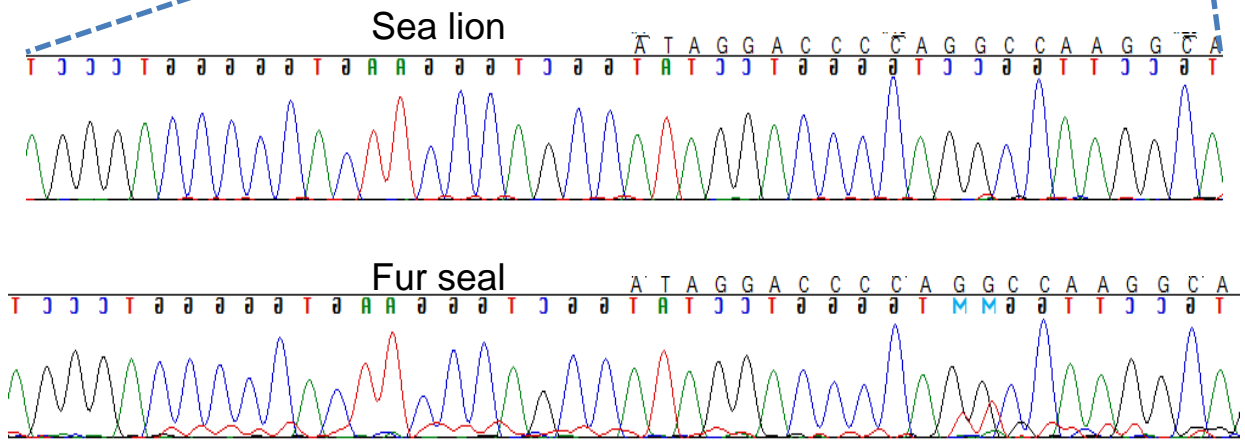

B

Dog Ex3 (559) CCTGAGCCCAACAGGACCAGCCTGGAGGCCACCTGCAACCAG  
 Sea Lion Ex3 (559) CCTGCGCCCAACAGGACCAGC:TGGGGGCCACCTGCAACCAG  
 (1-bp deletion)

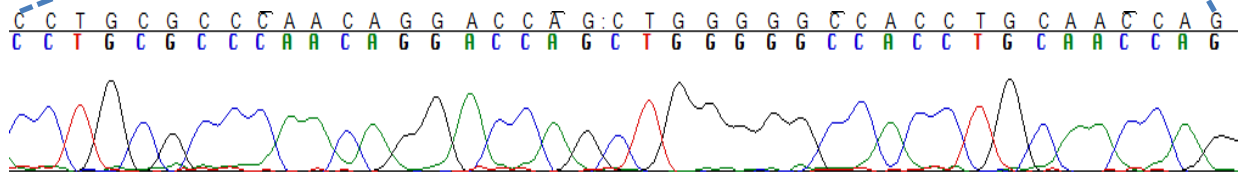

Fig. S1 continued

C

Dog Ex3 (655) TCCGGCGAGCGCGTGGTCTAC**AA**CGTGTACTCGGCTGTCTAC  
 Sea Lion Ex3 (654) TCTGGTGAGCGCGTGGTCTAG**::**CATGTACTCGGCTGTCTAC  
 Fur Seal Ex3 (655) TCTGGTGAGTGCCTGGTCTAG**::**CGTGTACTCGGTTGTCTAC  
 (2-bp deletion)

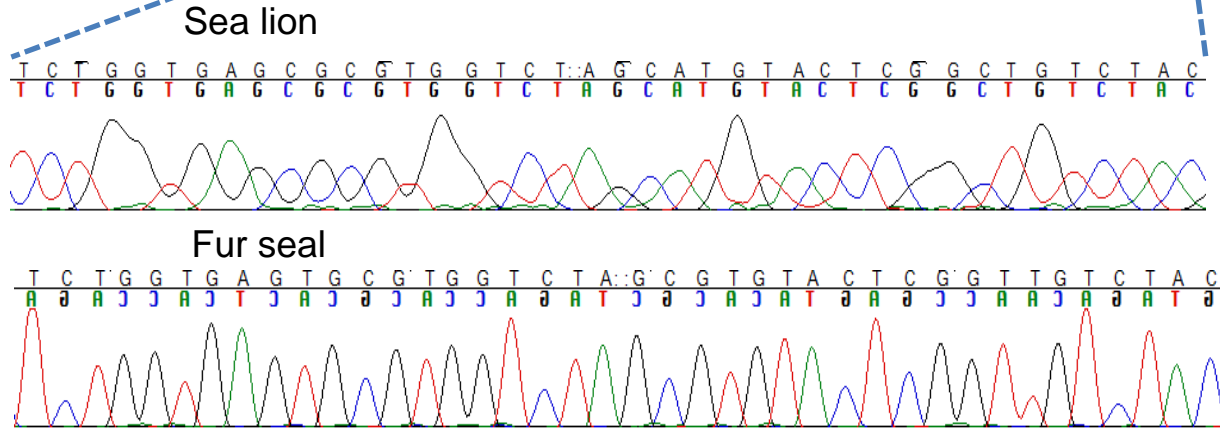

D

Dog Ex6 (780) CTCTTGATCACCGTGCTCAACCT**T**CTGGGCATCAGCTTTGGC  
 Sea Lion Ex6 (780) CTCTTGGTCACCATGCTCAACCC**:**CTGGGCATCAGCCCAGGC  
 Fur Seal Ex6 (780) CTCTTGGTCACCGTGCTCAACCT**:**CTGGGCATCAGCCCAGGC  
 (1-bp deletion)

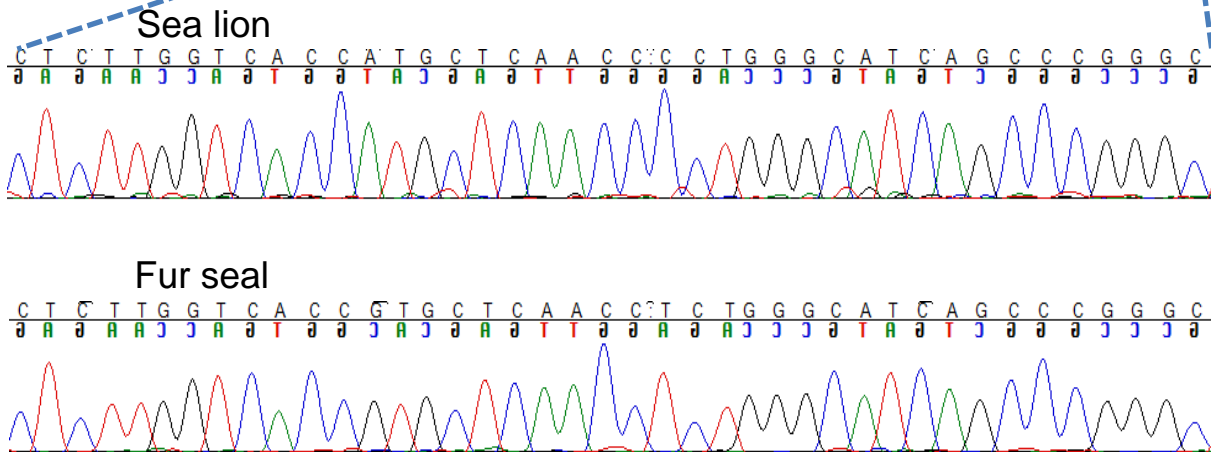

Fig. S2

Pacific Harbor Seal *Tas1r2* sequence

A

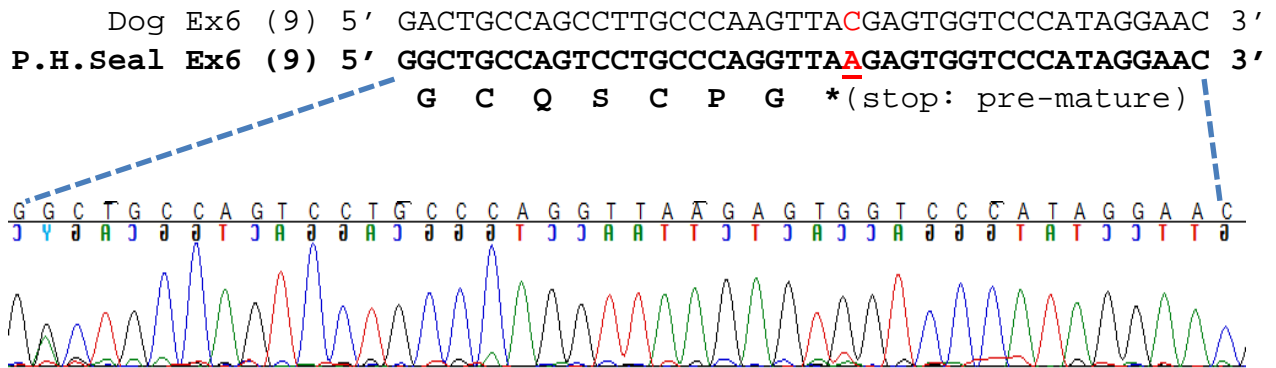

B

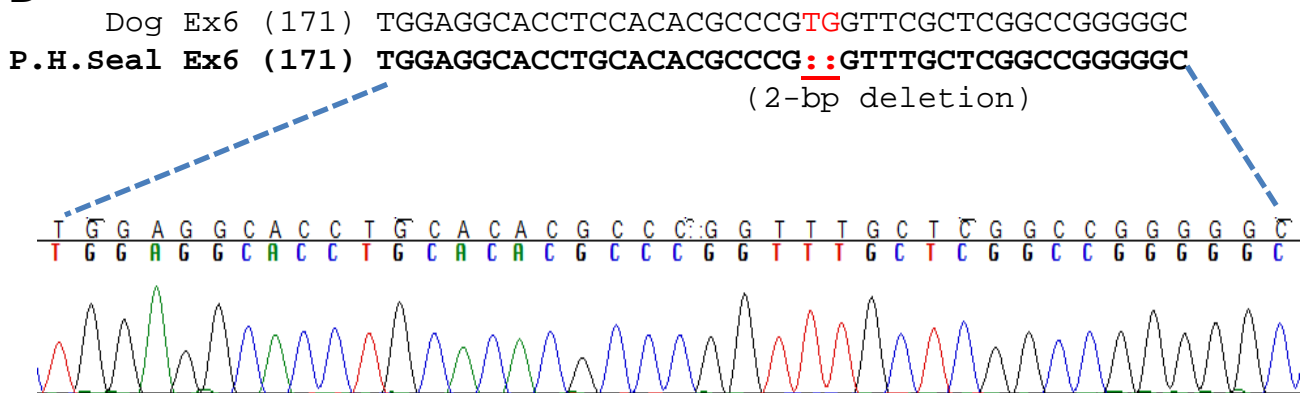

Fig. S3

Asian Otter *Tas1r2* sequence

Dog Ex3 (337) 5' CTGTTCTCGCCAGACCTGATCCT:GCACAACCTTCTTCCGCGAG 3'  
Otter Ex3 (337) 5' CTGTTCTCGCCCGACCTGGCCCTTGCACAACCTTCTTCCGCGAG 3'  
L F S P D L A (1-bp insertion)

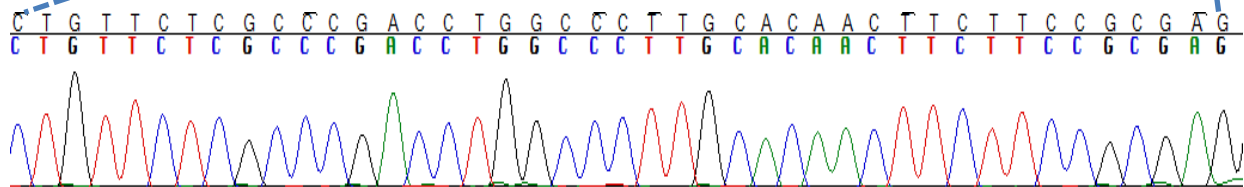

Fig. S4

Spotted Hyena *Tas1r2* sequence

Dog Ex2 (110) 5' ATAGTGGATGTCTGCTACATC:TCCAACAACGTCCAGCCCGTG 3'  
Hyena Ex2 (110) 5' GTGGTGGATATCTGCTACATC:CCAACAACGTCCAGCCCGTG 3'  
V V D I C Y I (1-bp deletion)

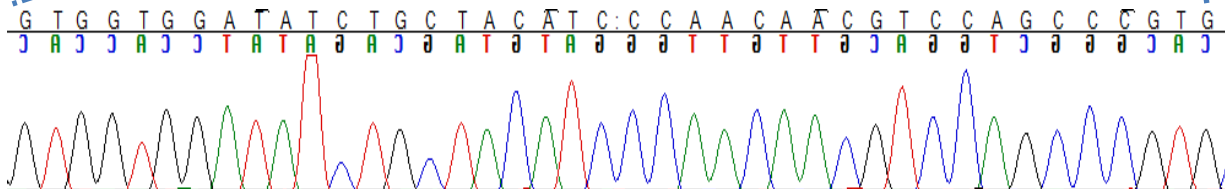

Fig. S5

Fossa *Tas1r2* sequence

A

Dog Ex3 (103) 5' CAGCTCCTGCTCCACTTCAACTGGAAGTGGATCATCGTGCTA 3'  
Fossa Ex3 (103) 5' CAGCTGATGCTGCTCTACTGCTAGAACTGGATCGTCGTGCTG 3'  
Q L M L L Y C \*(stop: premature)

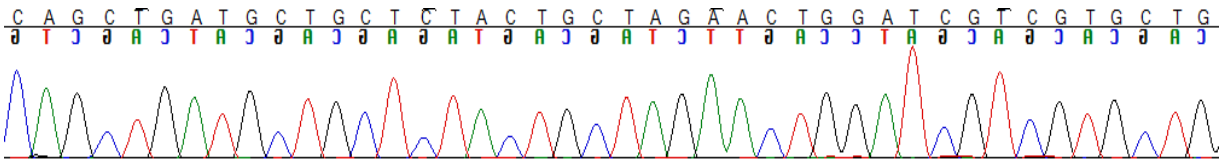

B

Dog Ex4 (37) CTGGGCCACAATGTCTTTTTT:GACAAGCAAGGGGACGTG  
Fossa Ex4 (37) CTGGGCCACCAGATCTTTTTTTGACAAGCAAGGGGACCTG  
(1-bp insertion)

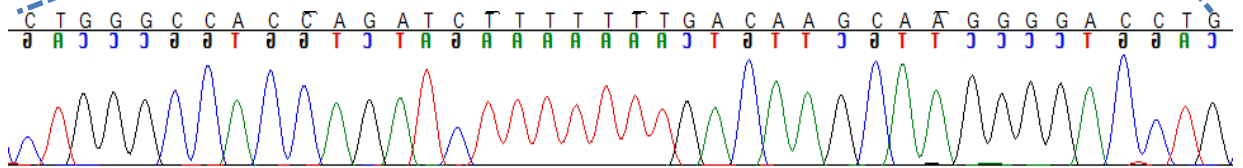

# Fig. S6

## Banded Linsang *Tas1r2* sequence

A

Dog Ex2 (47) 5' TTTGCGGTGGAAGAGATTAACAA:CCGCAGCGACCTGCTGCC 3'  
 Linsang Ex2 (47) 5' TTTG**CAGTGGAGGAAATCAGCAA**ACCATACCAGCCTGCTGCC 3'  
 F A V E E I S (1-bp insertion)

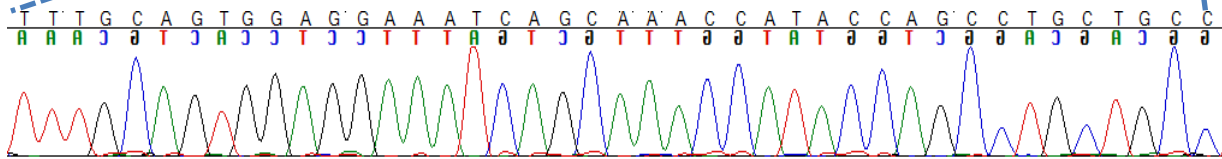

B

Dog Ex2 (251)GAGTCCACTACTACTGTGGCCCA**TTTCCTCTCA**CTCTTCCTCCTTCCACAG  
 Linsang Ex2 (252)GAGTCCACCACA**ACTGTGGCCCA**:**CTCTTCCTCCTTCCACAG**  
 (10-bp deletion)

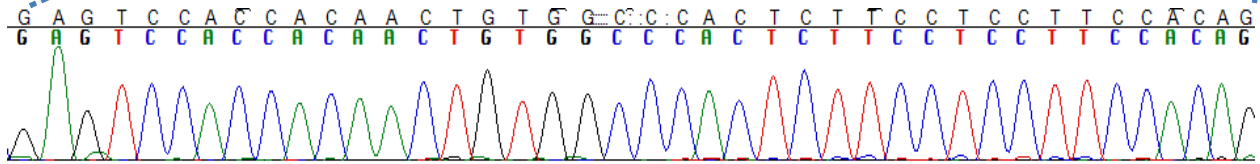

C

Dog Ex4 (55) TTTGACAAGCAAGGGGACGTGCT:~::~:CATGCCCATGGAGG  
 Linsang Ex4 (55) TTTGACAAGCAAGGGGACCTGCT**TGTCCCTGGAGAT**CATGCACCTGGAGA  
 (14-bp insertion)

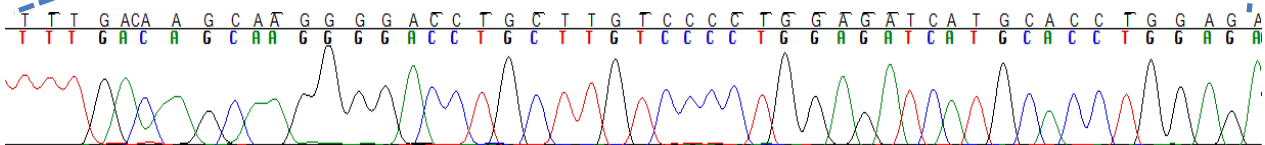

D

Dog Ex5 (7) TCCATGTGTTCCAAGGACT**TGCCATCCTGGCCAAAGGA**AAGCCTGTGGGCA  
 Linsang Ex5 (7) TCCATGTGTTCCAAGAC:**GAAGCCCATAGCCA**  
 (20-bp deletion)

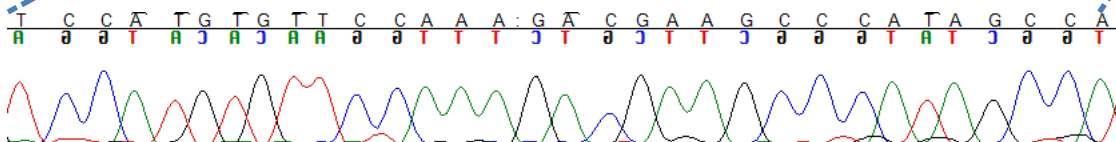

Fig. S6 continued

E

Dog Ex5(55) GTGGGCATCCACTCCTGCTGCTTCGAGTGTATTGACTGCCTT  
Linsang Ex5(35) ATAGCCATCCATCCCTGCTGCTTCGAGTGTCTCGACTGCCTT  
(2-bp deletion)

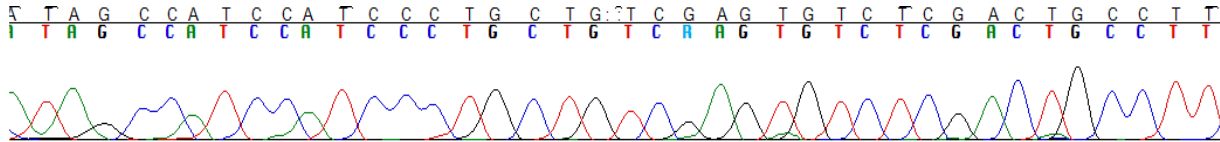

F

Dog Ex6 (189) CCCGTGGTTCGCTCGGCCGGGGCCCCATGTGCTTCCTGATG  
Linsang Ex6 (189) CCCATGGTTCGTTTCGGCCGGGGCCCCCATGTGCTTCCTGATG  
(1-bp deletion)

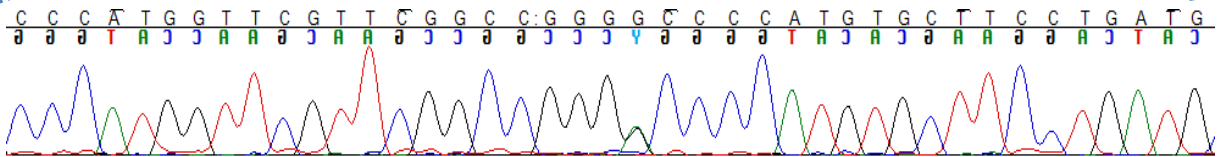

G

Dog Ex6(222) TTCCTGATGCTGGT::::::::::::::::::::::::::::GCCGCTGCT  
Linsang Ex6(221) TTCCTGATGCTGACATAATGATATAATGTTTGCTCAGTGAACGCCGCTGCT  
(28-bp insertion)

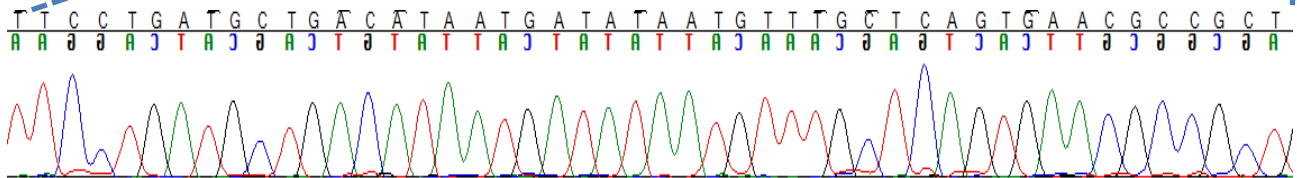

H

Dog Ex6 (416) AGGCGCCTCCC GCGCGCCTACGGCTACTGGGTGCGCTGCCAC  
Linsang Ex6 (423) AGGCGCCTCCTGCGAGCCTACGCTACTGGGTCCGCTACCAC  
(1-bp deletion)

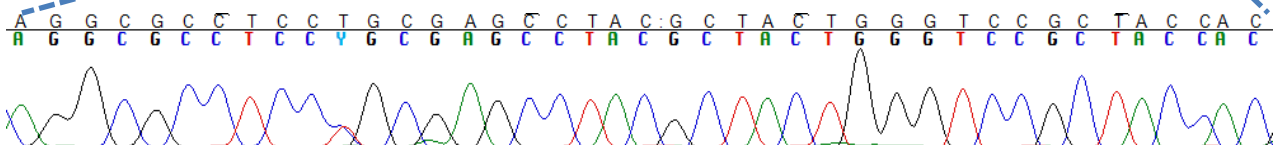



Fig. S7: Evolutionary Relationships of the order Carnivora

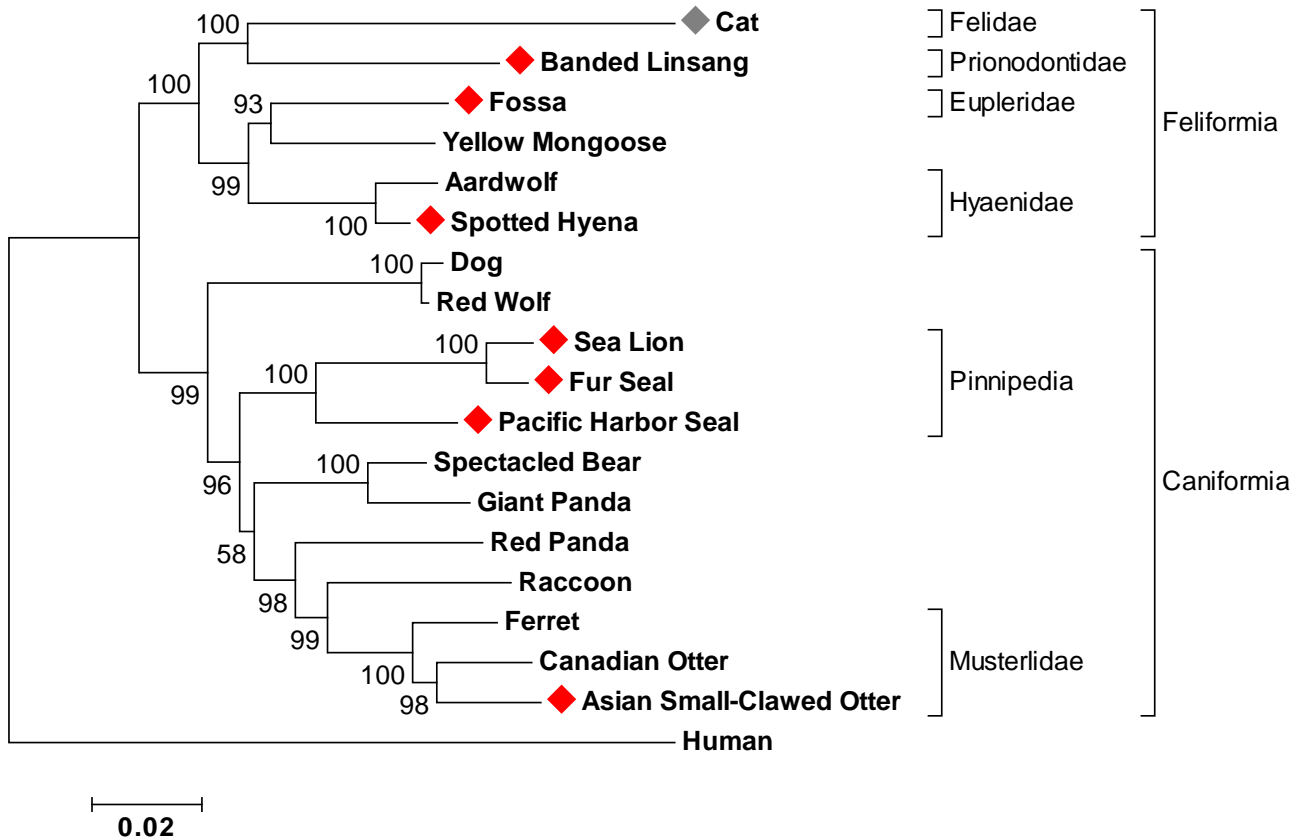

Fig. S8. The Sea Lion *Tas1r1* and *Tas1r3* Genes

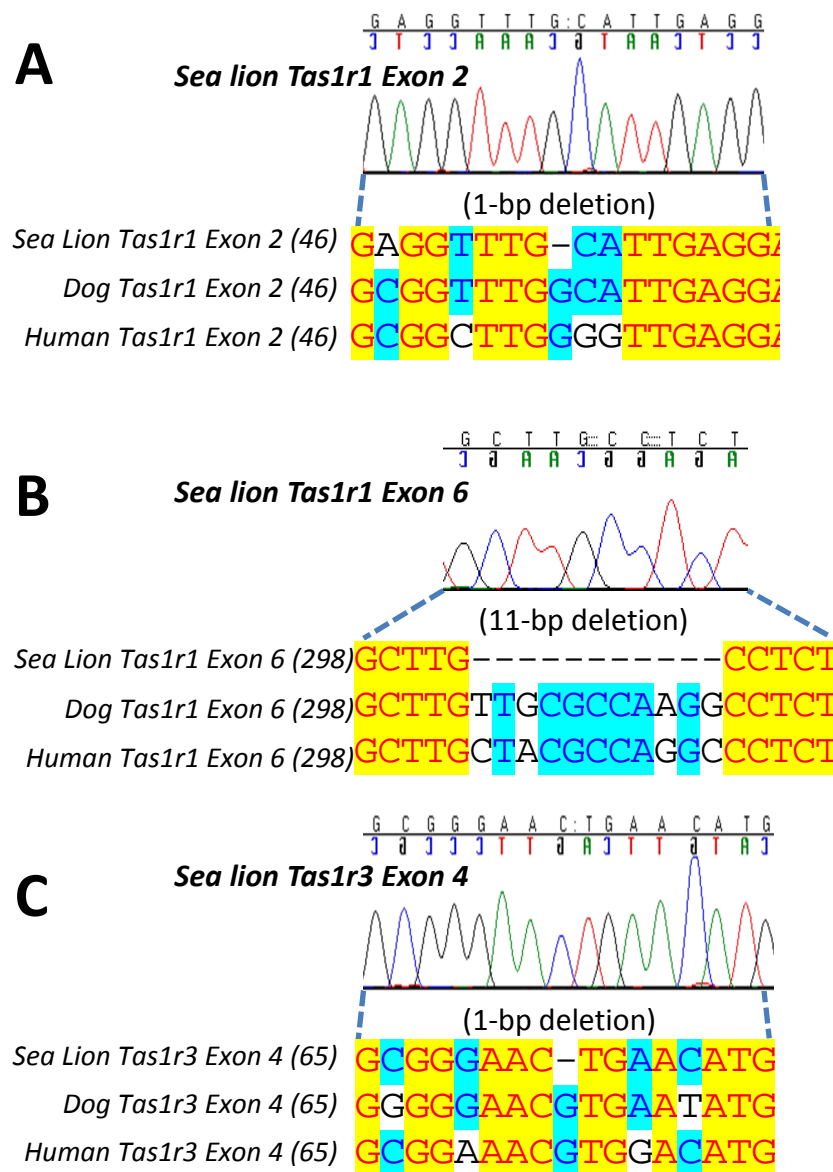

Fig. S9 The Dolphin *Tas1r* Receptor Genes

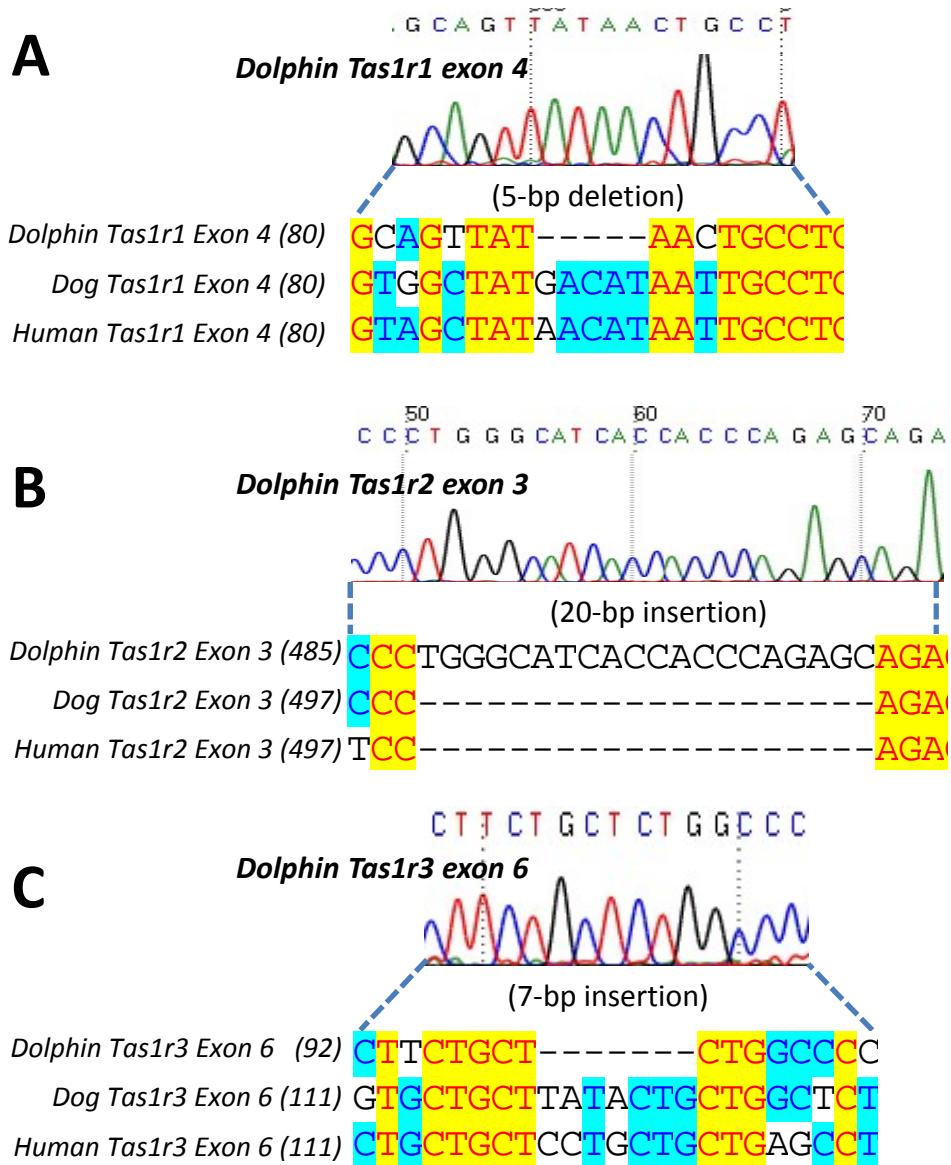

Fig. S10: Evolutionary Relationships of Dolphin, Dog and Cow *Tas2r* receptors

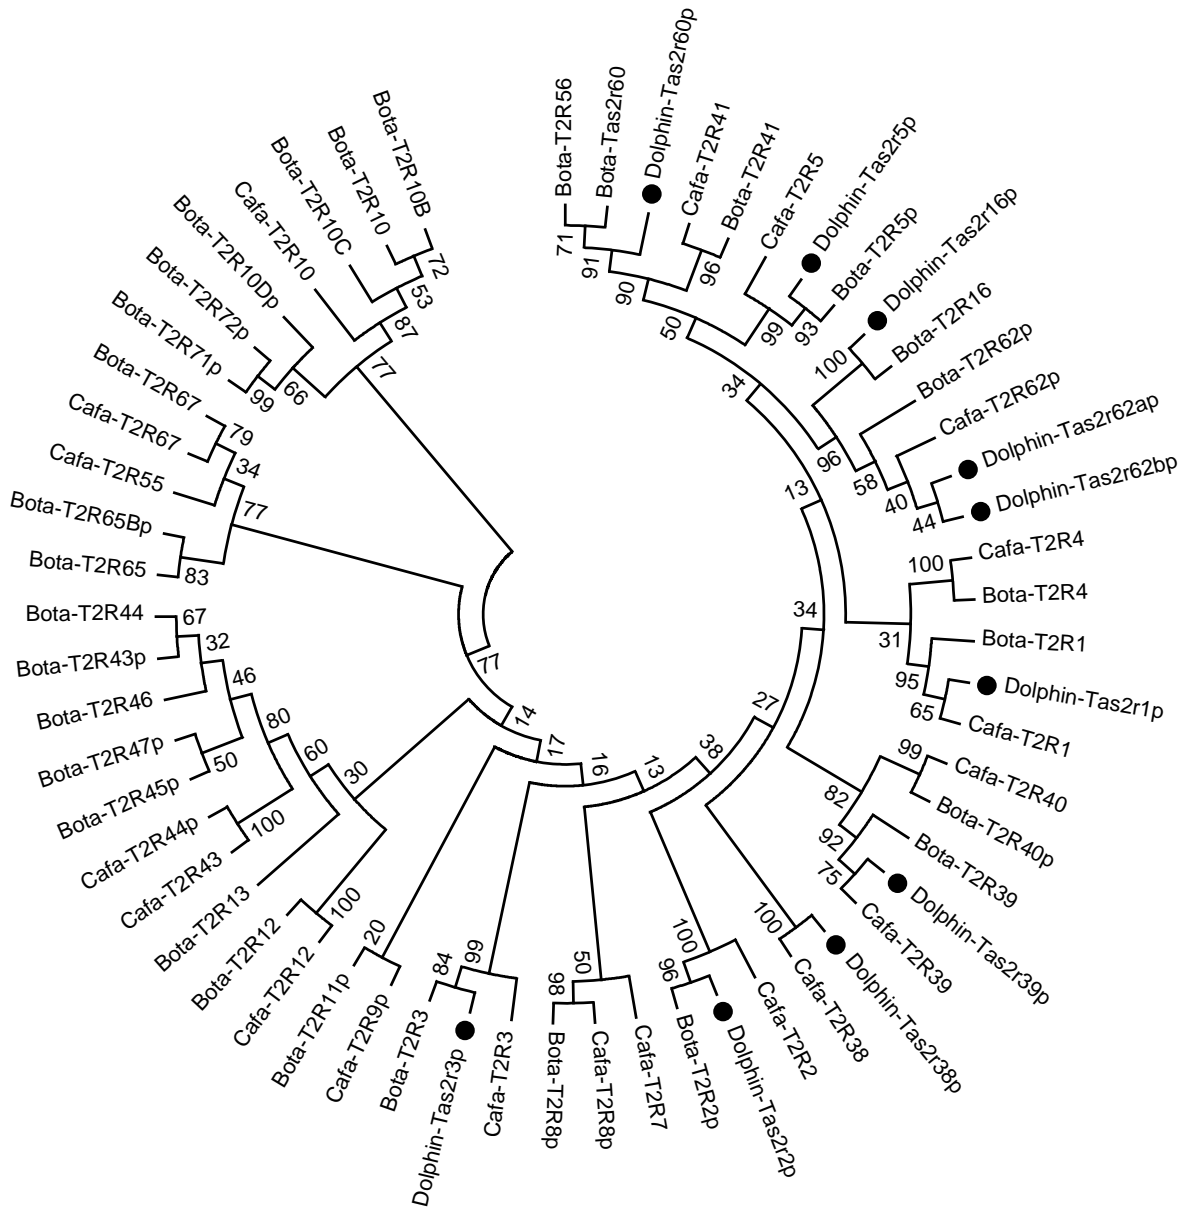

Table S1: Degenerate primers used to amplify exons of the sea lion *Tas1r1* and *Tas1r3*.

| <b>Tas1r1</b> |                              |
|---------------|------------------------------|
| T1R1_EX1_F1   | GGCCATGCCAGGCACAGGAC         |
| T1R1_EX1_R1   | CCCCTCACTCACCTGTCACAGAGRGT   |
| T1R1_EX2_F1   | GCTCTCAGCykGGCTTTCTCyACAG    |
| T1R1_EX2_R1   | CCAGCTyACCArGGCACCAG         |
| T1R1_EX3_F1   | CAGATCAGCTACGAGGCCAGCAG      |
| T1R1_EX3_R1   | CTTACCTGCCAGGGGTAGACTCGGT    |
| T1R1_EX4_F1   | TATyTCAGCTTCTrGAGCAGATCCGy   |
| T1R1_EX4_R1   | TTACCTGGTTGTCCTyyCCGTGCC     |
| T1R1_EX5_F1   | CAGAACACCTGTGGCTTCTTGACAGGT  |
| T1R1_EX5_R1   | CACTCACCrCTCTTGTTGAGGAAGsTsC |
| T1R1_EX6_F1   | CCTTTyCTTCCAGACCTCCACAGmTGC  |
| T1R1_EX6_R1   | TCAGGTGGAGCCGCAGCGCC         |
| <b>Tas1r3</b> |                              |
| T1R3_EX2_F1   | AGGTTCTCGkCyCTbGGCCTGCTC     |
| T1R3_EX2_R1   | CACCTGAGGCAYrAGGAAGAAGCTGAA  |
| T1R3_EX4_F1   | CAGCTCCTrGArAACATGTACAACd    |
| T1R3_EX4_R1   | CTCACCTGsTTCCChGGyGT         |
| T1R3_EX5_F1   | CAGCvGCCC GTGTCCCAGTGc       |
| T1R3_EX5_R1   | GAGGTGCTCACCTGGGyTGCGCT      |

**Doc. S1: Pairwise alignment of dolphin and dog (cafa) or cow (bota) Tas2r sequences (page 23 - page 35)**

**Tas1r1 [Cafa-T2R1 (AB249684)]**

Dolphin-Tas2r1p ATGCTGGAGTCTCACCTCATTAGCCACCTTTGTTGGCAGTGATAAAAATTTCTCTTTGGG  
Cafa-T2R1 ATGTTAGAGTTTTACCTTATTATCCATTTTCTTTTCACAGTGATGCAATTTCTCATCGGG  
\*\*\* \* \*\*\*\*\* \* \*\*\*\*\* \* \*\* \* \* \* \* \* \* \* \* \* \* \* \* \* \* \* \* \* \* \* \* \* \* \*

Dolphin-Tas2r1p GTTTTAGTAAATGGCATCATTGTGGTGTGAATGACACTCACTTGATCAAGCAGAGAAAAG  
Cafa-T2R1 GTTTTAGCAAATGGCATCATTGTGGTGTGAATGGCACTGAGTTGATCAAGCAGAGAAAAG  
\*\*\*\*\* \* \* \* \* \* \* \* \* \* \* \* \* \* \* \* \* \* \* \* \* \* \* \* \* \* \* \* \* \* \* \* \* \* \* \*

Dolphin-Tas2r1p ATGATTCCATTGGATCTCCTTGTTCCTGCTGGCGATTTCCAGGATTTGTCTGCAACTA  
Cafa-T2R1 ATGATTCCCTTGGCTCTCCTTCTTTGCTGTCTGGCGATTTCCAGGATTTGTCTACAATTG  
\*\*\*\*\* \* \* \* \* \* \* \* \* \* \* \* \* \* \* \* \* \* \* \* \* \* \* \* \* \* \* \* \* \* \* \* \* \* \*

Dolphin-Tas2r1p GCCATCTTCTACGTTAACCTGGCTGTTCTTTCCTTGATTGAATCCCTCAGCTTGCTGAG  
Cafa-T2R1 ATCATCTTCTTCATGAATCTGGGTACTCTCTTCTTGATTGAAGTCCCTTACTTGCTGAT  
\*\*\*\*\* \* \* \* \* \* \* \* \* \* \* \* \* \* \* \* \* \* \* \* \* \* \* \* \* \* \* \* \* \* \* \* \* \* \*

Dolphin-Tas2r1p AAGTTCGTAATTCTCACATTTATAAATGAATCGGGACTTTGAATTGGCCACATGGCTCAGC  
Cafa-T2R1 AATTTTGTAAATTTTCGTGTTTGTAAATGAATGGGACTTTGGTTCGCCACATGGCTTGGG  
\* \* \* \* \* \* \* \* \* \* \* \* \* \* \* \* \* \* \* \* \* \* \* \* \* \* \* \* \* \* \* \* \* \* \*

Dolphin-Tas2r1p CTTTTCTACCGTGCCGAGATTGCCACCATTGCTCACCCACACTT--CCGCTGAAGGTG  
Cafa-T2R1 GTTTACTACTGTGCCAAGATCGCCCCATAACTCACTCATTCTTTTCTGGTTGAAGATA  
\* \* \* \* \* \* \* \* \* \* \* \* \* \* \* \* \* \* \* \* \* \* \* \* \* \* \* \* \* \* \* \* \* \* \*

Dolphin-Tas2r1p AGGATATCCAAGTTGGTTCCTTGGCTGGCACTTGAGTCCCTGCTATATGCATCCAGCATG  
Cafa-T2R1 AGGATATCCAAGTGATGCCATGGCTGATCCTCGGTCCATGATGATGCATCCGTCCCT  
\*\*\*\*\* \* \* \* \* \* \* \* \* \* \* \* \* \* \* \* \* \* \* \* \* \* \* \* \* \* \* \* \* \* \* \* \* \* \*

Dolphin-Tas2r1p GATGTTTTCCACAGCAAACATAGGTGGATATTTTCCAAAGAACACTTCTGGGCCTTTTC  
Cafa-T2R1 TCTGTTTTCTGCAGCAAACAGATATGGGTTTATTTCCAAAACGTTTTGTCCAGCCTTTTT  
\*\*\*\*\* \* \* \* \* \* \* \* \* \* \* \* \* \* \* \* \* \* \* \* \* \* \* \* \* \* \* \* \* \* \* \* \* \* \*

Dolphin-Tas2r1p TCCCCAAATGCAACCAACCAATCAAAGAA-TACCTGCTTTACAGTTTGCCTTTCTTTTTG  
Cafa-T2R1 TCCCCAAACGCAACT--CAAATCAAAGAAACATCTGCTTTACAGATTGCCTTTCTTATTA  
\*\*\*\*\* \* \* \* \* \* \* \* \* \* \* \* \* \* \* \* \* \* \* \* \* \* \* \* \* \* \* \* \* \* \* \* \* \* \*

Dolphin-Tas2r1p CTGAGTTTCATTGCCATTACTTATCTTCTTATTTCTTCTCTGCTCTTGATATTTTCTCT  
Cafa-T2R1 GGTATTATTGCCACTGCTTATCTTCTCGGTCCACCCTACTTTTGATATTTTCCCT  
\* \* \* \* \* \* \* \* \* \* \* \* \* \* \* \* \* \* \* \* \* \* \* \* \* \* \* \* \* \* \* \* \* \* \*

Dolphin-Tas2r1p GGAGAGACACACCTGACAGATGAGAAACACAGCAACAGGCCCCAGGAGCCCTCGCACATG  
Cafa-T2R1 GGGGAGACACACCTGGCAGATGAGAAACACAGCAACAGGCCCCAGGAGCCCTAGCACAGG  
\* \* \* \* \* \* \* \* \* \* \* \* \* \* \* \* \* \* \* \* \* \* \* \* \* \* \* \* \* \* \* \* \* \* \*

Dolphin-Tas2r1p CGTGCACATCAGCACTTCTCTCCATCCTGTCCTTTCTGGTCTCTATCTCTGCCACTC  
Cafa-T2R1 TGTCACAGTGAGCAGATCCTGTCCTGTTCTATCTTCTGCTCTGCTCTGCCACTC  
\* \* \* \* \* \* \* \* \* \* \* \* \* \* \* \* \* \* \* \* \* \* \* \* \* \* \* \* \* \* \* \* \* \* \*

Dolphin-Tas2r1p CATGACAGCTGCTTTGCTCTTTTCCAAATTTTCAACTTTAGAAGCTTCATATTTCTGTT  
Cafa-T2R1 CATGGCAGCTGCTTTGCTCTTTTTCAGATCTTTTCAGCTCAGAAGCCTCGTCTTTCTGAT  
\* \* \* \* \* \* \* \* \* \* \* \* \* \* \* \* \* \* \* \* \* \* \* \* \* \* \* \* \* \* \* \* \* \* \*

Dolphin-Tas2r1p CTGCATCTTGTGGGTTGGTTCATAACCACTCTGGCACTCTATTACCTTAATTTTAGGAAA  
Cafa-T2R1 CTGTCCTGGGTGTTGGGTCCTATCCTTCTGGCACTCTATGATCTTAATTTTAGGAAA  
\* \* \* \* \* \* \* \* \* \* \* \* \* \* \* \* \* \* \* \* \* \* \* \* \* \* \* \* \* \* \* \* \* \* \*

Dolphin-Tas2r1p TCCTAAAATGAAACAAAATGCAAAGAAATTGCTCCTCCACAGAAAGTGCTGTCTAGTGA  
Cafa-T2R1 TCCTAAATTGAAACAAAATGCAAAGAAAGCTCCTCCTCCACGGGAAGTGCTGCCAGTGA  
\*\*\*\*\* \* \* \* \* \* \* \* \* \* \* \* \* \* \* \* \* \* \* \* \* \* \* \* \* \* \* \* \* \* \* \* \* \* \*

**Tas2r2 [cafa-T2R2 (AB249685)]**

```
Dolphin-Tas2r2p      ATGGCCTCCTCTTTGTCAGCTCGTCTTCATGTTATCCTCATGTGTCAGCAGAATTTATCACA
Cafa-T2R2            ATGATCTCCTTTTTGTCAGCTCTTCCTCATGTTATTTGTTATGTCAGCAGAATTTATCACA
***      *****      *****      *      *****      *      *****

Dolphin-Tas2r2p      GGGATTACAGTAAATGGATTTCTTATAATCATCGACTGTAATGAATTGGTCAAAAGCAGA
Cafa-T2R2            GGGATTACAGTAAATGGATTTCTTATCATCATGAACTGTAAGAATTGATCAAAAGCAGA
*****      *****      *****      *****      *****

Dolphin-Tas2r2p      AAGCTGACACCAATGCATCTCCTTTTCATATGCATAGGGATGCTAGATTGGTTTGCAG
Cafa-T2R2            AAGCCAACACCAGTGCAACTCCTTTTCATATGTATAGGGATGTCGAGATTGGTCTGCTC
****      *****      ****      *****      *****      *****      ****

Dolphin-Tas2r2p      ATAGTGTTAATGGTAAAG--TTTTCTCT-ATGTTCTTTCCACTCTTTTATAGACTTAAA
Cafa-T2R2            ATGGTGTTAATGATACAAAGTTTTTTCTCTTGTGTTATTTCCACTCTTTTATAAGGTAAAC
**      *****      *      *      *****      ****      *****      *****

Dolphin-Tas2r2p      ATTTATGGTACAGCGATGATTTTGGGGATGTTTTTTCAGCTCTGTCAGTCTCTGGTTT
Cafa-T2R2            ATTTTGGTACAGCAATGTTTCTCTTTTGGATGTTTTTTAGCTCTGTCAGTTTCTGGTTT
****      *****      ****      *      *      *****      *****      *****

Dolphin-Tas2r2p      GCCACCTGTCTCTCTGTATTTTACTGCCTCAAGATAACACACTTCACCCAGTACTGTTTT
Cafa-T2R2            GCCACCTGCCTTTCTGTATTTTACTGCCTCAAGATAGCAGGCTTCACTCAATCCTGTTTT
*****      **      *****      *****      *      *****      *      *      *****

Dolphin-Tas2r2p      CTTTGGCTGAAATTCAGGATCTCAAAGTTAATGCCTTGACTGCTTCTGGGAAGCTGCTG
Cafa-T2R2            CTTTGGCTGAAATTCAGGATCTCGAAGTTAATGCCTTGGCTACTTCTGGGAAGTTTGGCTG
*****      *****      *****      *****      *      *****      *****

Dolphin-Tas2r2p      ACCTCCGTGAGCATTGCAACTCTGTGTGTCAAGGTGGATTACCCATAAAATGTGGATATT
Cafa-T2R2            GCCTCCATGAGCATTGCAGCTCTGTGTATTGAAGCAGATTACCCATAAAAGGTGGATGAT
*****      *****      *****      *      *      *****      *****      *

Dolphin-Tas2r2p      GATGTCCTCAGGGATGCCATGCTAAAGAGGACTAAACTCAAGACAAGCAGATTAATGAA
Cafa-T2R2            GATGCCCTCAAGAATGCCACATTGAAGAGGACTGAACCAAGATAAGGCAAATTAGTGAA
****      *****      *      *****      *      *****      *      *****      *      *****

Dolphin-Tas2r2p      GTGCTTCTTGTCAGCTTGGCATTAAATATTTCCCTCTGGCCATATCTGTGAGGTGAAGTGT
Cafa-T2R2            ATGCTGCTTGTCAGCTTGGCATTACTATTTCCCTCTAGCCATATTTGTGATGTGCACTTTT
****      *****      *****      *****      *****      *****      ****      *      *

Dolphin-Tas2r2p      ATGTTATTTCAGTTCTCTCTATAAACACGCTAATCGGATGCAAAATGGACCTCTTGTTTT
Cafa-T2R2            ATGTTATTTCATTTCTCTCTATAAGCACACTCATCGGATGCAAAATGGATCTCATGGTGT
*****      *****      *****      *      *      *****      *****      *      *****

Dolphin-Tas2r2p      AGAAACGCCAGCACTGAAGCCCATATTAATACATTAAGATCAGTGATAACATTCTTTTGC
Cafa-T2R2            AGAAATGCCAGCACAAAAGCCCATATAAATGCATTAAAAACAGTGATAACATTCTTTTGC
*****      *****      *****      ****      *****      *      *****

Dolphin-Tas2r2p      TTCTTTATTTCTTATTTTGGCTGCCTTCATGGCAAATATGACATTGAGTATTCCTTATGGG
Cafa-T2R2            TTCTTTATTTCTTATTTTGGCTGCCTTCATGGCAAATATGACATTGAGTATTCCTTATGGA
*****      *****

Dolphin-Tas2r2p      AGTCAGTGCTTCTTTGTGGTGAAGGACATAATGGCAGCATATCCCTCTGGCCATTCGG
Cafa-T2R2            AGTCATTGCTTCTTTGTAGTAAAGGACATAATGGCAGCATTTCCCTCTGGTCAATCAA
*****      *****      *      *****      *      *****      *****

Dolphin-Tas2r2p      TTATAATTATCTTGGAGTAATCTCAGTTCCAACAACAGTCAGGAGACTTCTCTACCTCA
Cafa-T2R2            TTATAATCCTCCTGAGTAATCTAAATACCAACAACCTTTCAGGAGACTTCTCTGCTTCA
*****      **      *****      *      *****      *****      *****      *      ***

Dolphin-Tas2r2p      GAAAGAATCAATGA
Cafa-T2R2            GAAAGAATCAATGA
*****
```

**Tas2r3 [Cafa-T2R3 (AB249686)]**

Dolphin-Tas2r3p ATGCTGGGACTCACCGAGTGCGGGTTTCTGGTCTGACTGCCACTCAGTTCATTCTGGGA  
 Cafa-T2R3 ATGTCAGGGCTGGGAAATCCGTGTTCTGGTCTGTCTGTCACTCAGTTCATTCTGGGG  
 \*\*\* .\*\*.\*. .\*. \* \*\* \* \* \* \* \* :\*\*\* \* \* \* \* \* \* \* \* \* \* \*

Dolphin-Tas2r3p ATGCCGGGAATAGTTTCATGG GTTGGTCAATGGTAGCAGCTGGTTCAAGAACAAGAGA  
 Cafa-T2R3 ATGCTGGGGAATGGTTTCATAG GTTGGTCAATGGCAGCAGCTGGTTCAAGAACAAGACA  
 \*\*\* \* \* \* \* \* . \* \* \* \* \* . \* \* \* \* \* \* \* \* \* \* \* \* \* \* \* \* \* \* \* \* \* \*

Dolphin-Tas2r3p ACCTCTTTGTCTGACTTCATCATCACTAACC GGTTCTCTCCAGGATTGTTCTGTCTGTGG  
 Cafa-T2R3 GTCTCTTTGTCTGACGTTATCATCACTAACC GGTTCTCTCCAGGATTGTTCTGTCTGTGG  
 . \* \* \* \* \* \* \* \* \* \* \* \* \* \* \* \* \* \* \* \* \* \* \* \* \* \* \* \* \* \* \* \* \* \*

Dolphin-Tas2r3p ATTCTCTTTTTTTTTTTTTT GCGGTACGCGGTCTCTCACTGTTGCGGCCTCTCCCGTTGC  
 Cafa-T2R3 ATTCTCTTGGTTGATGGTG -----  
 \* \* \* \* \* \* \* \* : \* \*

Dolphin-Tas2r3p GGAGCACAGGCTCCGGACGCGCAGGCTCAGCAGCCATGGCTCACGGGCCAGCTGCTCCG  
 Cafa-T2R3 -----

Dolphin-Tas2r3p CGGCATGTGGGATCTTCCCGGACTGCGGCACGAACCCGTGTCCCTGCATCGGCAGGCGG  
 Cafa-T2R3 -----

Dolphin-Tas2r3p ACTCTCAACCCTGCGCCACCAGGGAAGCCCTCTGCTGTGGATTCTCTT TGA TGA TGGTG  
 Cafa-T2R3 ----- TTTAATGGTC  
 : \* \* . \* \* \* \* \*

Dolphin-Tas2r3p TTCTCTTCCAACTCCACGATGAATAATTGTCAGTCATGCAGATTAGTGATATTTTCTGG  
 Cafa-T2R3 TTCTTTTCCAAAGTACATGATGAAGGG--ACAGTAATGAAAATATTGATATTTTCTGG  
 \*\*\* \* \* \* \* \* . \* . \* \* \* \* \* . . . \* \* \* \* . \* \* \* \* \* \* \* \* \* \* \* \* \* \* \* \*

Dolphin-Tas2r3p ACATTTACAAACCCTGAGCATTGGCTTGCCACCTGTCTCAGTGTCTTCTACTGCCTG  
 Cafa-T2R3 ACATTTACGAACCACCTGAGCATTGGCTTGCCACCTGTCTCAGTGTCTTCTACTGCCTG  
 \* \* \* \* \* \* . \* \* \* \* \* \* \* \* \* \* \* \* \* \* \* \* \* \* \* \* \* \* \* \* \* \* \* \* \* \* \* \* \* \*

Dolphin-Tas2r3p AAAGTCGCCAGTTTCTCCATCCTACGTTCCCTCTGGCTCAAGTGAGAGTTTCCAGGTTG  
 Cafa-T2R3 AAAATTGCCAGTTTCTCCATCCGACGTTCCCTCTGGCTCAAGTGAGAGTTTCCAGAGTG  
 \*\*\* . \* \* \* \* \* \* \* \* \* \* \* \* \* \* \* \* \* \* \* \* \* \* \* \* \* \* \* \* \* \* \* \* \* \*

Dolphin-Tas2r3p GTTGTATGGATGCTGTTGG TACCCTGCTCTTATCATGTAGCAGTGCCGTCTCTCTGATC  
 Cafa-T2R3 GTCGTACAGATGATTTTGG TGCCTGCTCTTATCGTGTGCCAGTGCCATGCTCTGGTC  
 \* \* \* \* \* . \* \* \* \* \* . \* \* \* \* \* \* . \* \* \* \* \* \* \* \* \* \* \* \* \* \* \* \* \* \* \* \* \* \*

Dolphin-Tas2r3p CATGAATTTAAGATCTAGTCTGTTCTCAGTGGAAATGATGGAACAGGGAATGTGACTGAA  
 Cafa-T2R3 CATGAATTTAAGATCTATTCTATTCTCAGTGGAAATGCTGGTACAGGGAATGTGACCGAG  
 \* \* \* \* \* \* \* \* \* \* \* \* \* \* \* \* \* \* \* \* \* \* \* \* \* \* \* \* \* \* \* \* \* \* \* \* \* \* \* \*

Dolphin-Tas2r3p CCCTTTAGAAAGAAAAGAAATGAATATAAGCTGATCCATTTTCTGGCACTCTGTGGGAC  
 Cafa-T2R3 CACTTTAGAAAGAAGAGAAATGACTATAAAGTGGCCCATGTTCTTGGGACTCTGTGGAAC  
 \* . \* \* \* \* \* \* \* \* \* \* \* \* \* \* \* \* \* \* \* \* \* \* \* \* \* \* \* \* \* \* \* \* \* \*

Dolphin-Tas2r3p CTCCCTCCCTTAATGTATCTCTAGCTTCTACTTTCTGCTCATCTCTCTCTGGGGAGG  
 Cafa-T2R3 CTCCCTCCCTAATGTTTCTCTGGCCTCCTACTTTCTGCTCATCTTCTCCCTGGGAAGG  
 \* \* \* \* \* \* \* \* \* \* \* \* \* \* \* \* \* \* \* \* \* \* \* \* \* \* \* \* \* \* \* \* \* \* \* \* \* \* \* \*

Dolphin-Tas2r3p CGTATGCGGCAGATGCAGCAAACTTTACCGGCTCCAGATATCCAAGTACTGAGGCCCAA  
 Cafa-T2R3 CACACACAGCAGATGAAGCACAGTGGCACCAGCTCCAGAGATCTGAGCACGGAGGCCAC  
 \* . \* . \* . \* \* \* \* \* . \* \* \* \* \* . \* \* \* \* \* \* \* \* \* \* \* \* \* \* \* \* \* \* \* \* \* \*

Dolphin-Tas2r3p AAGAGGGCCATCAAATCATCCTTTCCTTCTTCTTCTTCTTCTTCTTCTTCTTCTTCTTCTTCT  
 Cafa-T2R3 CAGAGAGCCATCAAATCATCGTCTTTCCTTCTTCTTCTTCTTCTTCTTCTTCTTCTTCTTCTTCT  
 . \* \* \* \* . \* \* \* \* \* \* \* \* \* \* \* \* \* \* \* \* \* \* \* \* \* \* \* \* \* \* \* \* \* \* \* \* \* \*



|                 |                                                              |                                           |
|-----------------|--------------------------------------------------------------|-------------------------------------------|
| Dolphin-Tas2r3p | TTTGCAATTTTGACATCCAGTTATTTCT                                 | ACCAGCAACTGAGGTGATTATGATGACTGGA           |
| Cafa-T2R3       | TTTTTAATTACATCATCCAGTTATTTCA                                 | ACCAGAAACTGAGATGGTTAAGAGAGTTGGA           |
|                 | ***                                                          | *****: .:*****: *****.*****. *.**:* * . * |
| Dolphin-Tas2r3p | GAAGTAATTACAATGTTATATCCTGCTGGCCGCTCATATATTCATTCTGGGAAATAAT   |                                           |
| Cafa-T2R3       | GTAGTTGTTACAATGTTTACCCTGCCAGCCACTCATTTCGTTATCATTCTGGGAAACAAT |                                           |
|                 | *:***: .*****: ** ***** .**.****: .**.****** **              |                                           |
| Dolphin-Tas2r3p | AAGCTGAAGCAGATGTTTATGGAGACGCTTTGGTGTGAGCCTGGTCATCTGAAGCCTGGA |                                           |
| Cafa-T2R3       | AAGCTGAAGCAGATGTTTACGGAGATGCTGTGCTGTGAGCCTGGTTATCTGAAGCCTGGA |                                           |
|                 | ***** * ***** ** ** ***** *****                              |                                           |
| Dolphin-Tas2r3p | TCCAAGGAACCCGTTTTTCCATAG                                     |                                           |
| Cafa-T2R3       | TTCAAAGACCTTTTGCCCCATAA                                      |                                           |
|                 | * ** .**.* ** *****.                                         |                                           |

**Tas2r5 [Cafa-T2R5 (AB249688)]**

Dolphin-Tas2r5p            ATGCTGACTGCTGTCTAGGACTGTTAATGCGGGTAGCAGTGGCTGAATTTCTCATTGGC  
Cafa-T2R5                    ATGCTGACTGCTGCCCTACCCTGCTGATGGTGGTGGCAGTGGTGAATTTCTCATTGGC  
\*\*\*\*\*                    \*\*\*\*\*

Dolphin-Tas2r5p            CTGGTTGGAAATGGAGTCCCTCGTGGTCTGGAGTTTGGAGAACGGCTCAGAAAATCAAG  
Cafa-T2R5                    TTGGTGGGAAATGGAGTCCCTATGGTCTGGAGTTTGGTGAATGGGTGAGAAAATCAAC  
\*\*\*\*\*                    \*\*\*\*\*

Dolphin-Tas2r5p            GGGTCCCTCATATAACCTCATTGTCTGGGCTGGCTGTCTGT **TCG**TTTCTTCTGCAGTGG  
Cafa-T2R5                    GGGTCCCTCATACAACCTCATTGTCTGGGCTGGCTGTCTGCCGATTTCTCCTGCAGTGT  
\*\*\*\*\*                    \*\*\*\*\*

Dolphin-Tas2r5p            TTGATTATGGTGGACTTAAGTCTGTTTCCACTTTTCCAGAGCAGCCATTGGCTTCGCTAT  
Cafa-T2R5                    CTGATTATGATGGACTTAAGCTGTTTCCACTTTTCCAGAGTAGCCGTTGGCTTCACTAT  
\*\*\*\*\*                    \*\*\*\*\*

Dolphin-Tas2r5p            CTCATGTCTTCTGGGTCTTAGTAAACCAGACCAGCCTGTGGTTGCCACTTTCTCAGT  
Cafa-T2R5                    CTCAGTATCTTCTGGATCCTGGTAAGCCAGCCAGCCTGTGGTTGCCACTTTCTCAGC  
\*\*\*. \*                    \*\*\*\*\*

Dolphin-Tas2r5p            GTCTTCTACTGCAGGAAGATCATGACCTTTGAACACCCTGTCTACTTGTGGCTGAAGCAG  
Cafa-T2R5                    GTCTTCTACTGCAGGAAGATCATGACCTTTGAACATCCTGTCTGCTTGTGGCTGAAGCAG  
\*\*\*\*\*                    \*\*\*\*\*

Dolphin-Tas2r5p            AGGGCCTGTTGTCTTAGTCACTGGTGCCCTTCTGGTGTACTTTCATGATCAGTTTGTACTT  
Cafa-T2R5                    AGGGCCTATTGCCCTGAGTCTCTGGTGCCCTTCTGGTGTACTTTCATGATCAGTTTGTACTT  
\*\*\*\*\*                    \*\*\*\*\*

Dolphin-Tas2r5p            ATAGTCCAGGGTAGCTTAGAGTCTCCAATCTTTCCCAAGGAAACAGCAGCATTATATAC  
Cafa-T2R5                    GTAGCACACATTGGCTTAAAGCCCTATAATCCTTCTCAAGGCAACAGCAGCATTCTGTAC  
.\*\*\*. \*                    \*\*\*\*\*

Dolphin-Tas2r5p            CCCCTTCAAAGCTGGCACTGTCTGTATATATTAGGCTCAATACAGGAAGTATAATGCC  
Cafa-T2R5                    CCCCTTAAAGCTGGCACTACCTGTATATAGTAAAGCTCAACGCAGGAAGTGGATTGCC  
\*\*\*\*\*                    \*\*\*\*\*

Dolphin-Tas2r5p            TTCATGGTGTGCTTATTTCTCTGGGATGCAGATTGTCTCTTTGTGTAGACACCCGAGG  
Cafa-T2R5                    CTCATGGTGTGCTTATTTCTCTGGGATGCAGATTGTCTCTTTGTGTAGACACCACAAG  
\*\*\*\*\*                    \*\*\*\*\*

Dolphin-Tas2r5p            AAGATGAATGTCCATACAGTCCGAGGAGAGATGCTCAGGCCAAGGCTCACATCACTGTC  
Cafa-T2R5                    AAGATGGAGGTACATACAGCTGGTAGGAGAGATGCTCAGGCCAAGGCTCACATCACTGTA  
\*\*\*\*\*                    \*\*\*\*\*

Dolphin-Tas2r5p            CTGAAGTCTTGGGCTGTTTCTTATACTTTACATAGTTTACATCTGGCCAGCCCTTCT  
Cafa-T2R5                    CTGAAGTCTTGGGCTGCTTCTTATCCTTTCATGTGATTTATATCTGGCCAGCCCTTCT  
\*\*\*\*\*                    \*\*\*\*\*

Dolphin-Tas2r5p            TCCATCACCTCCAGTCTTTTCTGCTGCTCTTACCGCTCTCTTCATCTCTGAGACACTC  
Cafa-T2R5                    TCCATTACCTCCAAGTCTT---CTGCTGATCTCCTCGTTGTCTTCATCTCTGAGACACTC  
\*\*\*\*\*                    \*\*\*\*\*

Dolphin-Tas2r5p            ATGGCTGCC **TAG**GCTTCTCTTCTTCTGTCATATTGATCATGGGGAATCCAGGATGAAG  
Cafa-T2R5                    ATGGCTGCC **TAT**CCTTCTCTTCTTCTGTCATTTCTGATCCTGGGGAATCCAGGATGAAG  
\*\*\*\*\*                    \*\*\*\*\*

Dolphin-Tas2r5p            CAGACTTGTGAGAGAATCTGTGGAAGACAGTGTACGCTTGGAGAGAA **AGG**AGTGGTAA  
Cafa-T2R5                    CAGACTTGTGAGAGAATCTGTGGAAGACAGTGTGTGCTTGGAAATCC **TAG**-----  
\*\*\*\*\*                    \*\*\*\*\*

Tas2r16 [Bota-T2r16 (AB249716)]

Dolphin-Tas2r16p ATGATAACCATCCAACCTCT--GTCTTCTTCATGATCATCTATATGCTCAAGCTCTTGACA  
Bota-T2R16 ATGACAACCAGCCAACCTCTCGGTCTTCTTCATGATTATCTATATGCTCGAGTCTTGATA  
\*\*\*\*\*

Dolphin-Tas2r16p ATAATTATGCAGAGCAGCTTAACTGTTGTAGTGCTGGGCACAGAGTGGGTAAGTTTCCAA  
Bota-T2R16 ATAACTGGGCAGAGCAGCCTGATTGTTGTAGCGCTGGGCAGAGACTGGGTGCAGACTCAA  
\*\*\*\*\*

Dolphin-Tas2r16p AGGCTATCACCTGTGGAAATGATTCTCACCGGCTGGGTGTCTCCATGCTTCTGTCAACT  
Bota-T2R16 AGGCTGCCACCTGCGGACATGATTCTCATCAGCCTGGGCATCTTTTGCTTCTGTCAACT  
\*\*\*\*\*

Dolphin-Tas2r16p GTGGTCATCAATGTCTGTACAACCTTTTGCTCCCACTTCTACCCTAGTTACGAATTTTGTA  
Bota-T2R16 GTGGTCATCGATGCTGTACAACCTTTTGTTCCCACTTCCACCCTAATTACAATTTTGTA  
\*\*\*\*\*

Dolphin-Tas2r16p CTTCAGTATCGTCTGGGAATTTACTAACATTCCTTCATTCTGGTTCAGCATGTTTGC  
Bota-T2R16 TTTCCGGGATCATCTGGGAATTTACTAACATCCTTTCCTTCTGGTTGACCAGCTTGCTTGC  
\*\*\*\*\*

Dolphin-Tas2r16p TGTCTTCTACTGTGTCAAAGTCTCCTCCTCAGCCACCCCATCTTC--TGGCTGAAGTG  
Bota-T2R16 TGTCTTCTACTGTGTCAAAGTCTCCTTCTCAGCCACCCCGTCTTCTCTGGCTGAAGTG  
\*\*\*\*\*

Dolphin-Tas2r16p GAGAATTGTGAGGTTGGTTCCTTGGCTGTTGCTGGGTTCTCTGCTGACTTCTTGTGTGC  
Bota-T2R16 GAGAATTGTGAGATGGGTTCCCTCGGCTGTTGCTGGGCTCTCTGCTGATTTCTTGTGTGC  
\*\*\*\*\*

Dolphin-Tas2r16p TATCATCTTTGCAGCTGTTGGGCATTACAGCAAGATTCAACTAATCTCCATGACGCATTT  
Bota-T2R16 TACCATATTTCCAGCTACTAGTTATTACATTGATATTCAATTCATCGCCATGAAGCATTT  
\*\*\*\*\*

Dolphin-Tas2r16p CCCTAGAAACAGCACCATGACTGAGAGACTTGAGATATTCCTGTGGGATTCTTCCATGTG  
Bota-T2R16 CCCTAGAAACAGCACCATGCTTGAGAGACTTGAGGCGTTCCCTGTGGGATTTTCCACACT  
\*\*\*\*\*

Dolphin-Tas2r16p TCACAA-GTGGTTGTGTTGATTATTCCTTTCCCTCCTGTTCCCTGGCCTCCACCGTCTTGCT  
Bota-T2R16 GCACAAAGTAGTTGTGTTGGTTATTTCCTTTCCCTCCTGTTCCCTGGCCTCCACAGTCTTGCT  
\*\*\*\*\*

Dolphin-Tas2r16p CATGGCCTTATTATTTCCAACACCTGAGGCAGATGAAAGATCATCACACCAGCCACTC--  
Bota-T2R16 CATGGCCTTATTATCCCGACATCTGAAGCAGATGAAAGACCTTCACACAGGCTGCTCAA  
\*\*\*\*\*

Dolphin-Tas2r16p TCCAGCCTGAAAGCTCACTCTACTGCCCTGAGGTCTCTTGCTGTCTTCCCTCATTTTCTT  
Bota-T2R16 TCCAGCCCAGGCTCACTCTGCCGCCCTGAGGTCCCTTGCCATCGTCCCTCATCTTGT  
\*\*\*\*\*

Dolphin-Tas2r16p CACCTCTTATTTTCTGACCCTAATAATCTCCATGTGGGGTGTCTTTTAAATAAGGGGTC  
Bota-T2R16 CACCTTTTATTTTCTACCGTGTCTCTCCATATTGGATGTCTATTTAATAAAGAGTC  
\*\*\*\*\*

Dolphin-Tas2r16p CTGGTTCTGGGCCTGGGAAGCTATCATCTGTGCTCTGGTCTCTATTCAATTTGACTTCACG  
Bota-T2R16 CTGGTTCTGGGCCTGGGAAGCTATCATCTATGCATTAGTCTCTATTCAATTTACTTTACT  
\*\*\*\*\*

Dolphin-Tas2r16p GATGCTGAGCAGCCCTAAACTGAAAAGGGTTTTAAAGGTAAAGTGCTGGGACCTAGAGGC  
Bota-T2R16 AATGCTGAGCAGTGTCAAACCTGAAAAGAGTTTTAAAGGCAAGGTGCTGGAGCCTAGAAGC  
\*\*\*\*\*

Dolphin-Tas2r16p TGCCTGA  
Bota-T2R16 TGCCTGA  
\*\*\*\*\*

**Tas2r38 [Cafa-T2R38 (AB249694)]**

Dolphin-Tas2r38p ATGGTGA CTCTGACTGCCACTGTA ACTGTGCCCTATGAAGTCAGGAATGCATTTCTGTTC  
 Cafa-T2R38 -----ATGTTT  
 \*\*\*\*\*

Dolphin-Tas2r38p TTTTCAGTCCTGGAGTTTGCAGTAGGGATCCTGGTCAATGCCTTCATTTTCTTGATGAAT  
 Cafa-T2R38 CTTTCAGTACTGGAGCTCGCAGTGGGGATCCTGACCAATGCCTTCATTTTCTTGTTGTAAT  
 \*\*\*\*\* \* \*\*\*\*\*

Dolphin-Tas2r38p TTTTGGGTCGTGGTGAGGAGGTGGCCACTGAGCAACTGTGATCTGTCTCTGCTGAATCTC  
 Cafa-T2R38 TTTTGGGATGTGGTGAGGAGGCACCCACTGAGCAACTGCGATCTTATCCTTCTGAGTCTC  
 \*\*\*\*\* \* \*\*\*\*\*

Dolphin-Tas2r38p AGCCTCACCTGGCCTTTTCTACACGGGCTGCTCTTTCTGGATGCCATCCAGCTTACCCAC  
 Cafa-T2R38 AGCCTCACTCGACTTTTCTGCATGGGCTGCTGTTTCTGGATGCCATCCAGCTTACATAC  
 \*\*\*\*\* \* \*\*\*\*\*

Dolphin-Tas2r38p TTCCAGTGGGTAAAAGACCCGCTGGGCCTCTGCTACCAGACCACCTCATGCTCTGGATG  
 Cafa-T2R38 TTCCAGCGGATGAAAGACCCACTGAGCCTCAGCTACCAGACCATCATCATGCTCTGGATG  
 \*\*\*\*\* \* \*\*\*\*\*

Dolphin-Tas2r38p CTCGTAAATCAAGCTGGCCTCTGGCTCACCACCTGCCTTAGTCTCCTCTACTGCTCCAGG  
 Cafa-T2R38 ATCACAACCAAGCTGGGCTCTGGCTCACCACCTGTCTCAGTCTTTTCTACTGCTCCAAG  
 \* \*\* \*\*\*\*\* \* \*\*\*\*\*

Dolphin-Tas2r38p ACTGTCCATTTCTTTACACCTTCTCTCCTCCGCTTGGCAAGCTGGATCTCCAGGAAGATC  
 Cafa-T2R38 ATTGTCCGTTTCTCTCATACCCTCTTCTCTGCTTGGCAAACCTGGGCTCCAGGAAGGCA  
 \* \*\*\*\*\* \* \*\*\*\*\*

Dolphin-Tas2r38p CCCAGATGCTCCTGGGTGCTATTTTTTCTCCTGTGTCTGCACTGTTCTCTATTTGTGG  
 Cafa-T2R38 CCCAGATGCTCCTGGGTGCCATGCTTTTTCTCTTCTGCTGCACTCTCCTCTGTTTGGGG  
 \*\*\*\*\* \* \*\*\*\*\*

Dolphin-Tas2r38p GACTTTTTCAATAGATCTCAGTTCAGTTGCAACCATGCTACTCATGAATAA CAATA  
 Cafa-T2R38 GACTTCTTTAGTAGATCTGGCTTTGCATTCAACTGTGCTACTCATGAATAA CAGAA  
 \*\*\*\*\* \* \*\*\*\*\*

Dolphin-Tas2r38p CTCAATTGAGAAAC TGAAGAAA ACTCAATTTCTTTCAATTCCTTCTCTGTCAGCCTGGG  
 Cafa-T2R38 TTTAATTCAAAATGT TAAA ACTCAATTTCTATATTCTCCATCTTCTGTACCCTGGG  
 \* \*\*\*\*\* \* \*\*\*\*\*

Dolphin-Tas2r38p GTCCACCCCTTCTTTCTTGTCTTTTTCTGGTTTCTTCTGGGGTGTGATTGCTCCTCGGG  
 Cafa-T2R38 GTCAATCCCTCCTTTTCATGTTTTTCTGGTTTCTTCTGGGGTGTGATTATCTCTCGGG  
 \*\*\* \* \*\*\*\*\* \* \*\*\*\*\*

Dolphin-Tas2r38p GAGGCACATGAGGACAAGGAGGGCCAAAACCAAGACTCTCGGGACCCAGCCTGGAGGC  
 Cafa-T2R38 AAGGCACATGAGAACAATGAAGGCCAACACCAAGACTCCGGTGACCCAGCCTGGAGGC  
 \*\*\*\*\* \* \*\*\*\*\*

Dolphin-Tas2r38p CCACATCAAAGCACTCGGGTCTC ATCTCTTTCTTCTGCTGATGTGGTGTCTCTG  
 Cafa-T2R38 CCATATCAAAGCACTCATATCTC ATCTCCTTCTTCTGCTGATGTGGTGTCTCTG  
 \*\*\* \*\*\*\*\* \* \*\*\*\*\*

Dolphin-Tas2r38p CGCTGGCTTTCATCTCGGTGCCTTTGCTGATGCTGTGGCACAACAAGATCGGGGTCATGGT  
 Cafa-T2R38 TGTTGCCCTTATCTCAGTGCCTTTAAACCATGGTGTGGCACAACAAGATCGGGGTAATGAT  
 \* \* \* \* \* \*\*\*\*\* \* \*\*\*\*\*

Dolphin-Tas2r38p CTGTGCAGGGATACTGGCAGCCTGCCCTCGGGGCACACAGTCATCTGATCTCAGGCAA  
 Cafa-T2R38 CTGTGTAGGGATCTAGCAGCTTGTCCCTCTATACATGCAGCCATCTGATCTCAGGCAA  
 \*\*\*\*\* \* \*\*\*\*\*

Dolphin-Tas2r38p TGCCAAGCTGAAGAGAGCCGTGGAGACCATTCTGCTCCGGGCTCAGAGCAGCCTAAAGGT  
 Cafa-T2R38 TGCCAAGCTGAGGAGAGCTGTGGAGACCATTCTACTCTGGGTTTCAAGCAGCCTAAAGGT  
 \*\*\*\*\* \* \*\*\*\*\*

Dolphin-Tas2r38p  
Cafa-T2R38

AAGGGCGGACCGCAAGGCAGATCCCAGGATGCCAGATCTATGTTGA  
AAGGGCAGGCCACAGGGCAGATCTCAGGACTCCAGATCTATGTTGA  
\*\*\*\*\* \* \*\* \* \* \*\*\*\*\* \*\*\*\*\* \*\*\*\*\*

**Tas2r39 [Cafa-T2R39 (AB249695)]**

Dolphin-Tas2r39p ATGACTGAAACCTGCAATCCCCAGAAAATCAACTGTCACCATCTCGCATCATTTTGTATG  
 Cafa-T2R39 ---ATGGAAACCTGCAATCCCCAGAAAATGAATGTCACCATTTGGCATCCTCTCGATT  
 \* \* \* \* \* \* \* \* \* \* \* \* \* \* \* \* \* \* \* \* \* \* \* \* \* \* \* \* \* \* \* \*

Dolphin-Tas2r39p **TGA**ATCGTTATAGGCACCGAATGCGTCCTTGGTCTCACTGCAAATGGGTTCATTGTGGCT  
 Cafa-T2R39 TTAACAATTACAGGCACTGAATGCATCGTTGGTATCATTGCAAATGGGTTCATCATGGCT  
 \* \* \* \* \* \* \* \* \* \* \* \* \* \* \* \* \* \* \* \* \* \* \* \* \* \* \* \* \* \* \* \*

Dolphin-Tas2r39p ATAAATACAGCAGGATGGATTACAACAAGGCAGTTTCCACAAGTGGCAAGATCCTGCTT  
 Cafa-T2R39 ATAAATGCGGCTGAATGGATTAAAAATAAGACAGTTTCCACAAGTGGCAGATCCTGTTT  
 \* \* \* \* \* \* \* \* \* \* \* \* \* \* \* \* \* \* \* \* \* \* \* \* \* \* \* \* \* \* \* \*

Dolphin-Tas2r39p CTCCTGAGCGTATCCGGAAGAGTGTACAAAGCTTCATGATGCTAGAACTCACCTTCAGT  
 Cafa-T2R39 TTCTTGAGTGCATCCAGAATAGCTCTCCAAAGCTTCACAATGCTAGAAATTACCTTCAGT  
 \* \* \* \* \* \* \* \* \* \* \* \* \* \* \* \* \* \* \* \* \* \* \* \* \* \* \* \* \* \* \* \*

Dolphin-Tas2r39p TCAACATCCCCACACTTTTATAATCAAGACATT**CATC**GTATATGATACGTTCAAAGGAAG  
 Cafa-T2R39 TCAACATCCCCACGTTTTTATAATGAAGATGTT**----**ATGTATGACACATTCAAAGTAAG  
 \* \* \* \* \* \* \* \* \* \* \* \* \* \* \* \* \* \* \* \* \* \* \* \* \* \* \* \* \* \* \* \*

Dolphin-Tas2r39p TTTTCATGTTCTTAAATGATTGTAGCCTCTGGTTTGCTGCCTGGCTTAGATTCTTCTACTT  
 Cafa-T2R39 TTTTCATGTTCTTAAATCATTGTAGCCTCTGGTTTGCTGCCTGGCTCAGTTTCTTCTACTT  
 \* \* \* \* \* \* \* \* \* \* \* \* \* \* \* \* \* \* \* \* \* \* \* \* \* \* \* \* \* \* \* \*

Dolphin-Tas2r39p CGTGAAGATGGCGGATTTCTCCTACCCCTTTTCCTCAAGCCGAAGTAGAGAATTTCTGG  
 Cafa-T2R39 CGTGAAGATTGCTGATTTCTCCACCCCTTTTTCCTCAAGCTGAAGTGGAGAAATTCAG  
 \* \* \* \* \* \* \* \* \* \* \* \* \* \* \* \* \* \* \* \* \* \* \* \* \* \* \* \* \* \* \* \*

Dolphin-Tas2r39p ATGGATGCCCTGGTTTCTGTGACTATCAGTGTGTTGTTTCCTT**G**GGCCACAGTGTGTTCT  
 Cafa-T2R39 ACTGATGCCCTGGCTTCTGTGGCTTTCACTGCTTATTTTCCTT**G**GGCTACAGTATGCTCC  
 \* \* \* \* \* \* \* \* \* \* \* \* \* \* \* \* \* \* \* \* \* \* \* \* \* \* \* \* \* \* \* \*

Dolphin-Tas2r39p TCCTCAAAAACATCTACACTATGCATTGCAACCATCCTTTTTCTAGCCCCCTCTTCAACT  
 Cafa-T2R39 TCTCCAATGACATCTACACTGTGATTGTAACAATTCTT---CTATCCCCTCTTCAACT  
 \* \* \* \* \* \* \* \* \* \* \* \* \* \* \* \* \* \* \* \* \* \* \* \* \* \* \* \* \* \* \* \*

Dolphin-Tas2r39p CCACTAAGAAAAATTACTTCACTGAGACCAACGTGATCAGCCTGGTTCTTTTCTTTAACG  
 Cafa-T2R39 CCACTAAGAAAAATACTTCACTAAGACCAATGTGGTCAACCTGGTTCTTCTTATAACG  
 \* \* \* \* \* \* \* \* \* \* \* \* \* \* \* \* \* \* \* \* \* \* \* \* \* \* \* \* \* \* \* \*

Dolphin-Tas2r39p TGGAATCTTCGTTCTCTGATCAGTTTTCATCCTACCTGCCACCCTGCTGATCATCTCTC  
 Cafa-T2R39 TGGGGATCTTCATCTCCTAATCATGTTTCATCCTTTCGGCCACCCTGCTGATCATCTCTC  
 \* \* \* \* \* \* \* \* \* \* \* \* \* \* \* \* \* \* \* \* \* \* \* \* \* \* \* \* \* \* \* \*

Dolphin-Tas2r39p TAAAGAGACACACCCTACACATGAAAAGCAATGCCACTGGTTCCAGGGACCCAGCATGG  
 Cafa-T2R39 TCAAGAGACATACTACTACACATGAAAAGCAATGCCACTGGCTGCAGGGACCCAGCATGG  
 \* \* \* \* \* \* \* \* \* \* \* \* \* \* \* \* \* \* \* \* \* \* \* \* \* \* \* \* \* \* \* \*

Dolphin-Tas2r39p AGGCTCATGTGGGGACCATCAAAGCTATCAGCTATTTTCTCATTTTCTAAATTTCAATG  
 Cafa-T2R39 AGGCTCACATAGGGCCATCAGAGCCAGCAGCTATTTTCTCATTCTATATTTTCAATT  
 \* \* \* \* \* \* \* \* \* \* \* \* \* \* \* \* \* \* \* \* \* \* \* \* \* \* \* \* \* \* \* \*

Dolphin-Tas2r39p CAGATGCTCTATTTCTTTCCATGTCGACATCTTTGATATCAATAGTTCTTAGAATACTT  
 Cafa-T2R39 CAGTTGCTCTATTTCTTATATGTTCAACATCTTTGATATCAACAGCTCCTGGAATATTT  
 \* \* \* \* \* \* \* \* \* \* \* \* \* \* \* \* \* \* \* \* \* \* \* \* \* \* \* \* \* \* \* \*

Dolphin-Tas2r39p TGTGCAAAATCATCATGGCTGCCTATCCTGCTGACCACTCCATCTACTGATACAGGACA  
 Cafa-T2R39 TGTGCAAATTCATCATGGCTGCCTACCTGCTGGTCACTCCATCTGCTGATTCAGGACA  
 \* \* \* \* \* \* \* \* \* \* \* \* \* \* \* \* \* \* \* \* \* \* \* \* \* \* \* \* \* \* \* \*

Dolphin-Tas2r39p ACCCTGGGTTGAGAAGAGCCTGGAAGCGGCTTCAGCCTGGAAGCGGAGTTACACCTTTACT  
 Cafa-T2R39 ACCCTGGGTTGAGAAGAGCCTGGAAGCGGCTTCAGCCTCAA-----GTTTCTTTTACT  
 \* \* \* \* \* \* \* \* \* \* \* \* \* \* \* \* \* \* \* \* \* \* \* \* \* \* \* \* \* \* \* \*

Dolphin-Tas2r39p  
Cafa-T2R39

```
TGA--GAGTGGACTCTATGA  
TAAAGAGCAGACTCCATGA  
* *   ***   *****   ****
```

Tas2r60 [Bota-Tas2r60 (XM\_002687121)]

Dolphin-Tas2r60p ATGAGTGGAGAGGACGTGGTTCCAGGACCTCAGTTGGCTGATAAGATAGCCTTTATCTTT  
Bota-Tas2r60 ATGAACGGAGGGGACATGGTTCCCTGGACCTCAGTTGGTTGATAAGACAGCCCTTGTCTGC  
\*\*\* \*\*

Dolphin-Tas2r60p GCTATCATTATTTATTCCTTTTGTGCTTGGTGGCAGTGGTGGTAATGGCTTAATCACCATG  
Bota-Tas2r60 ATTATTTATTTATTCCTTTTGTCTGGTGGCATTGGTAGGTAATGGCTTAATCATCATG  
\*\*\* \*\*

Dolphin-Tas2r60p GCACTGGGCATGGAGTGGTTGCTGCAGAGAACTTTGTCACCCTGCAATAAGTTATTGGTC  
Bota-Tas2r60 GCACTGGGCAGCGAGTGGCTGCTGCAGAGAACGTTGTCGCCTTGCGATAAGTTATTGGTC  
\*\*\*\*\* \*\*

Dolphin-Tas2r60p AGCCTGGGAGCCCTAGCTTCTATCTG TGA TGGGTGGTGAT --- AAGAACATTTATATT  
Bota-Tas2r60 AGCCTGGGGGCTCTCGCTTCTGTCTGCAATGGGTGGTGAT TAGT AAGAACATTTACATT  
\*\*\*\*\* \*\*

Dolphin-Tas2r60p TTCCTGAATCCAATAGCCTTCCCATAACAAC -- GTATTCCAGTTCCCTAGCCTTTCAGTGG  
Bota-Tas2r60 TTCCTGAATCCCATGGCCTTCCCATAACAAC CC GTGTTCCAGCTCCTGGCCGTTTCAGTGG  
\*\*\*\*\* \*\*

Dolphin-Tas2r60p GACTTCTTGAATGCTGTCACGTTATGGTTCTCCACCTGGCTCAGTGTCTTCTCTGTGTG  
Bota-Tas2r60 GACTTCTGGAACCTGCAACACTGTGGTTCTCCACCTGGCTCAGTGTCTTCTACTGTGTG  
\*\*\*\*\* \*\*

Dolphin-Tas2r60p AAAATCGCAACCTTCAACCACCTGTCTTCCCTCTGGCTAAAGCAGATAGTGTCTGCGTTG  
Bota-Tas2r60 AAAATGGCACCTTCAACCACCCGCTTCTCTGGCTAAAGCGGAATGTATCTGGGTTG  
\*\*\*\*\* \*\*

Dolphin-Tas2r60p GTTCCATGGGTGCTGCTCAGCTCCGTGGGGTCTCCAGCTTCCAGCACCATTCTAGTTTTTC  
Bota-Tas2r60 GTTCCATTGGATGCTACTCAGCTCTCTGGGGTCTCTACCTTTACCACCATTCTATTTTTTC  
\*\*\*\*\* \*\*

Dolphin-Tas2r60p ATAGGCAACCGGAGAATAGATCAGAACTATTTAAAGAGGGTCTGCAACCTTGAATATGTC  
Bota-Tas2r60 ATAGGCAACCACAGAATGTATCAGAACTATATAAAGAAGGGTCTGCAACCTTGAATATGTC  
\*\*\*\*\* \*\*

Dolphin-Tas2r60p GCTGGGAATGCTGTGAGAACATATGAGAGACTCTGCTTCTCCCTTTGAAAATGTTACC  
Bota-Tas2r60 ACTAGGAATGCTGTGAGAACATATGAGAGGTTCTGCCTCTCCCTTTGAGAATGTTACC  
\*\* \*\*\*\*\*

Dolphin-Tas2r60p TGGACAGTCCCTACTGTTGTCTTTCATCGCTGGCATGGCTTTGCTCATTCCACCTCTGGGA  
Bota-Tas2r60 TGGACCGTCCCTACTGTTATCTTTATTGTGGGCACAGTTTTGCTCATTACATCTCTGGGA  
\*\*\*\*\* \*\*

Dolphin-Tas2r60p AGACACACCAAGCAGGTCTCCCTGTCCATCTCAGGCTCTCACGATCCAGCACCAGGCA  
Bota-Tas2r60 AGACACACCAAGAAGGTCTTCTTCTCCATCTCAGGCTTTCACAGTCCAGTGCCAGGCA  
\*\*\*\*\* \*\*

Dolphin-Tas2r60p CACATCAAGGCTCTC-----ATCTCCTTTGCTGTCTCTTTGTTTCCCTATTTTCTG  
Bota-Tas2r60 CACATCAAGGCTCTCTGGCTTTTATCTCCTTTGCTATCTTCTCACTTCTCTTTTCTG  
\*\*\*\*\* \*\*

Dolphin-Tas2r60p TCACTGGTGTCTCAGTGCCTCAGGTGTGTTCCATCACGGGAATTCTG CACTGGGTGTGG  
Bota-Tas2r60 TCACTGGTCTCACTGCCTCAGGTATGTTTCTTTGGGAATCCG GTTCTGGATATGG  
\*\*\*\*\* \*\*

Dolphin-Tas2r60p CAGGCTGTGATTTATCTGTGCACAGTAGTCCGCCCCATTGTTCTTTTCTTGAGTAACAGC  
Bota-Tas2r60 CAGACTGTGATTTATCTGGGTACAGCAATCCACCCCTTATTCTTCTCTTGAGTAACCGC  
\*\* \*\*\*\*\*

Dolphin-Tas2r60p AGACCGAGAGCTGTGCTAGAGAGGGGCTGCTCCTCAG GCATGGGCATCTTGA  
Bota-Tas2r60 AGGCTGAGAGCTGTGCTAGAGAGGGGCTGCTCCTCAG CACATGGGCATCTTGA  
\*\* \* \*\*\*\*\*



Tas2r62a [Cafa-T2R62p (AB249701)]

Dolphin-Tas2r62ap ATGCCCTCCTCACCCATGTTGATCTTCATGGTCATCTTTTTCTGGAGTTGCTGGCTGCC  
Cafa-T2R62p ATGTCCTCCTCACCTACATTGATCTTCATGGTCATCTTCTTCTGGAGTCGTGGCTGCA  
\*\*\* \*\*\*\*\* \* \*\*\*\*\* \*\*\*\*\* \* \*\*\*\*\*

Dolphin-Tas2r62ap ATGCTGCAGAATGGCTTCATAGTTACTGTGTTGATCAGGGAGTGGGTACAATGCCAGACA  
Cafa-T2R62p ATGCTGCAGAATGGCTTCATAGTTACTGTGTTGAGGAGTGGGTGCGACGCCGACG  
\*\*\*\*\* \*\*\*\*\* \*\*\*\*\* \* \* \*\* \*\*

Dolphin-Tas2r62ap CTGCTTGCAGGCGACATGATTGCGGCGCCTCCCTGGCCGCCTCCCGGTTCTGCAT  
Cafa-T2R62p CTGCCTGCAGGTGACATGATTGTGC---CTCCCTGGCTGCCTCCTGGTTCTGCCTGCAT  
\*\*\* \*\*\*\*\* \*\*\*\*\* \*\* \*\*\*\*\* \*\*\*\*\* \*\*\*\*\* \*\*\*\*\*

Dolphin-Tas2r62ap GGGATGGCCCTCTGAACAACCTCGTGGCCTTCTTTGGTTTTGGTTTTCAGAATTTACTAT  
Cafa-T2R62p GGGGTGGCCATCTGAACAACCTCTTGATCTTCTTTGGTTTTCACTTCGTAAGGGATTAT  
\*\*\* \*\*\*\*\* \*\*\*\*\* \* \*\*\*\*\* \*\*\*\*\* \*\*\*\*\* \*\* \* \*\*

Dolphin-Tas2r62ap TTCAGCATCCCCTAGGACTTCATCAACTCTCTCACTTTCTGGCTTACTGCTTGGCTTGC  
Cafa-T2R62p TACAACACCCTCTGGCACTTTGTCAACACTCTCACTCTCTGGCTCACTGCCTGGCTTGC  
\* \* \* \* \* \* \* \* \* \* \* \* \* \* \* \* \* \* \* \* \* \* \* \* \* \* \* \* \* \* \* \* \* \* \* \*

Dolphin-Tas2r62ap ACATTCTACTGTGTGAAGATCTCATTCTTCTCTCACCCCATCTTCTTTGGGCTGAAGTTG  
Cafa-T2R62p GTCTTCTACTGTGTGAAGGTGCGCGTCTTCTCTCACCCGGTCTTCTTCTGGCTGAAATGG  
\*\*\*\*\* \*\*\*\*\* \* \* \*\*\*\*\* \*\*\*\*\* \*\*\*\*\* \*\*\*\*\* \* \*

Dolphin-Tas2r62ap AGGATTTCTCGGTCAGTGCCCAGGCTGCTGCTGGGCTCCCTGATCTTATCTGCTCTGGTA  
Cafa-T2R62p AGGATTTCTCGGTTAGTGCCCAGGCTGCTGCTGGGCTCCCTGGTCTTAGTTGGCCTGACA  
\*\*\*\*\* \*\*\*\*\* \*\*\*\*\* \*\*\*\*\* \*\*\*\*\* \*\*\*\*\* \*\*\*\*\* \*\* \*\* \*

Dolphin-Tas2r62ap GCCATCCCGTTAGACTGGGAACACAATTCGTGTGCGGATGGTTGCTGCCAGAGTTCC  
Cafa-T2R62p GTCATCTCATCAGCCATTGTGACTGGAATTCGAAACAGATGATTGCCTCCAAGAGTTCC  
\* \* \* \* \* \* \* \* \* \* \* \* \* \* \* \* \* \* \* \* \* \* \* \* \* \* \* \* \* \*

Dolphin-Tas2r62ap CATGGAAACAGCACCTGGCTGGTAGAACACAGACTGTCTCTTTGTACTTTTTTCTACCT  
Cafa-T2R62p CAAGGAAACAGCACCTGGGCTGAGAGAGTACAGGCCTTCTATAGGTCTTTTCAAATATTT  
\*\* \*\*\*\*\* \*\*\*\*\* \*\*\*\*\* \* \* \* \* \* \* \* \* \* \* \* \* \* \* \*

Dolphin-Tas2r62ap CGTGTAATTATTATGCGGTCAATTCCATTTCTCCGTCCTGGTGTCCACCCTCTCGTGT  
Cafa-T2R62p GATGTAATGCTTATGTGGTCAATTCCATTTCTCATGGCTTGTGTCCATGCTCTGCTGG  
\*\*\*\*\* \*\*\*\*\* \*\*\*\*\* \*\*\*\*\* \* \* \* \* \* \* \* \* \* \* \* \* \* \*

Dolphin-Tas2r62ap TCTCGCTGCGCCGCATTTGGGGCAGATGAGGGACCATAGACCTGGCCCCGAGTGATCCC  
Cafa-T2R62p -----

Dolphin-Tas2r62ap AGCACCTGGGCTCACACCGTGGCCTGAAGTCACTTGCCTTCTTCTCACCTTCTACCAT  
Cafa-T2R62p -----

Dolphin-Tas2r62ap CACGTTACCTGTGCCTGATTATCGTTGTTATAAACATCCTAACCTCTGGAATCACTGGC  
Cafa-T2R62p -----

Dolphin-Tas2r62ap GCTGGGCCTGGGAAGTGGTACCTGTGCAGGCATCTGTGCGGCACTCCAGCATCTCGGTGC  
Cafa-T2R62p -----

Dolphin-Tas2r62ap ACGGCAGCCCCAGGCTGAGAAAGGCCCTGATGACGAGGCCTTGGAGAGCCCTGGGCAAGG  
Cafa-T2R62p -----

Dolphin-Tas2r62ap AGCAGTTTGTCTCATCAGAGTCACTGAACAAGCCCATGGGTGG  
Cafa-T2R62p -----

**Tas2r62b [Cafa-T2R62p (AB 249701)]**

Dolphin-Tas2r62bp      GCGTCCCCCTCACCCACGTGGACCTGCACGGTCACCTTTCTCCTGGAGTCGGTGGCTGCC  
Cafa-T2R62p            ATGCTCCTCCTCACCTACATTGATCTTCATGGTCATCTTCTCCTGGAGTCGTGGCTGCA  
                              \*\*\*\*\*      \* \* \* \* \*      \* \* \* \* \*      \* \* \* \* \*      \* \* \* \* \*      \* \* \* \* \*      \* \* \* \* \*

Dolphin-Tas2r62bp      AGGCTGCAGAACGGCCTCACAGTCGTCTGTGCTGAGCCGGACTGGGACGC **TGGAC** GCTGCC  
Cafa-T2R62p            ATGCTGCAGAATGGCTTCATGGTTACTGTGTTGGGCAGGGAGTGGGTGC **-----** GACGCC  
                              \*      \* \* \* \* \*      \* \* \* \* \*      \* \* \* \* \*      \* \* \* \* \*      \* \* \* \* \*      \* \* \* \* \*

Dolphin-Tas2r62bp      GGACGCTGTGCGCAGGCGACG **TCA** TTGTGGCCCGCCTGGCCGTCTCCAGTTCTGTCTGC  
Cafa-T2R62p            GGACGCTGCCTGCAGGTGACATGATTGTGGCCTCCCTGGCTGCCTCCTGGTTCTGCCTGC  
                              \*\*\*\*\*      \* \* \* \* \*      \* \* \* \* \*      \* \* \* \* \*      \* \* \* \* \*      \* \* \* \* \*      \* \* \* \* \*

Dolphin-Tas2r62bp      AAGGGATGGCCCTCCAGCGCAACCTCCTGGCTTCCTTTGGTTTGGTTCCCAATT--TT  
Cafa-T2R62p            ATGGGGTGGCCATCCTGAACAACCTCTTGATCTTCTTTGGTTTTCACCTCGTAAGGGATT  
                              \*      \* \* \* \* \*      \* \* \* \* \*      \* \* \* \* \*      \* \* \* \* \*      \* \* \* \* \*      \* \* \* \* \*

Dolphin-Tas2r62bp      ATTTCAGCATCTCCTGGAGCTTCATCAACACTCTCACTTTCTGGCCGACCAGCTGGCTTG  
Cafa-T2R62p            ATTACAACACCTCTGGCACTTTGTCAACACTCTCACTCTCTGGCTCACTGCCTGGCTTG  
                              \*\*\*      \* \* \* \* \*      \* \* \* \* \*      \* \* \* \* \*      \* \* \* \* \*      \* \* \* \* \*      \* \* \* \* \*

Dolphin-Tas2r62bp      CTGTCTTCTACCGTGTGAAGGTAGCATCCTTCTCTCACCCCATCTTCTTCTGGCTGAAGT  
Cafa-T2R62p            CTGTCTTCTACTGTGTGAAGGTGCGCGTCTTCTCTCACCCGGTCTTCTTCTGGCTGAAAT  
                              \*\*\*\*\*      \* \* \* \* \*      \* \* \* \* \*      \* \* \* \* \*      \* \* \* \* \*      \* \* \* \* \*      \* \* \* \* \*

Dolphin-Tas2r62bp      GCAGGATTTCTCGGTCAGTGCCCGGGCTGCTGCTGGGCTCCCTGATCCTGTCTGGTCTGA  
Cafa-T2R62p            GGAGGATTTCTCGGTTAGTGCCCAGGCTGCTGCTGGGCTCCCTGGTCTTAGTTGGCCTGA  
                              \*      \* \* \* \* \*      \* \* \* \* \*      \* \* \* \* \*      \* \* \* \* \*      \* \* \* \* \*      \* \* \* \* \*

Dolphin-Tas2r62bp      CA **T**TCATC **---** AGCAGCCACCGGAAGTCAATTCTTGTGCAGATGGTTGCCACCAGGGTT  
Cafa-T2R62p            CA **S**TCATC **T**CATCAGCCATTGTGACTGGAATTCTGAAACAGATGATTGCCTCCAAGAGTT  
                              \* \*      \* \* \* \* \*      \* \* \* \* \*      \* \* \* \* \*      \* \* \* \* \*      \* \* \* \* \*      \* \* \* \* \*

Dolphin-Tas2r62bp      CCCATGGCAACGACACCCTCACGCAATTATCATG **CGGTC** **AG**TTCCATTCTCTC **TG**TTCCCT  
Cafa-T2R62p            CCCAAGGAAACAGCACCTGGGCTGAGAGAGTACA **GGCC** **---**TTCTATAGGTCT **---**TTTCA  
                              \*\*\*      \* \* \* \* \*      \* \* \* \* \*      \* \* \* \* \*      \* \* \* \* \*      \* \* \* \* \*      \* \* \* \* \*

Dolphin-Tas2r62bp      GGTGTCCACCCTCTCGCTCGTGTCTCGCTGCACCGGCACCTTGGGGCAGATGAGGGACCA  
Cafa-T2R62p            AATATTTGATGTAATGCTTATGTGGTCA--GTTCCATTCTCATGGCTTGTG-----TC  
                              \* \*      \* \* \* \* \*      \* \* \* \* \*      \* \* \* \* \*      \* \* \* \* \*      \* \* \* \* \*      \* \* \* \* \*

Dolphin-Tas2r62bp      CAGACCCGGCCCGAGTGATCCCAGCACCCGGGCTCACACCGTGGCCCGGAAGTCACTTGC  
Cafa-T2R62p            CATGCTCTGCTGG-----  
                              \* \*      \* \* \* \* \*      \*

Dolphin-Tas2r62bp      CTTCCTTTTTCATCCTATTTCTGTGCCTGAGAATTGTCTTGTGAACATCCCAACCCTCC  
Cafa-T2R62p            -----

Dolphin-Tas2r62bp      GGAAGCACCGGCACTGGGAAGCGGTGACCTACGCCGGCATCTGTCTGCACGCCAGCATCT  
Cafa-T2R62p            -----

Dolphin-Tas2r62bp      TGGTGCACAGCAGCCCCAAGCCGAGAAGGGCCCCAAGAAGAGGCTTTCGGCGAGCCCTGG  
Cafa-T2R62p            -----

Dolphin-Tas2r62bp      GCAAGGAGCAGTTTGTATTGAGTTACCGGTATCAATGA  
Cafa-T2R62p            -----
